# Supplementary material for: Rare pathogenic structural variants show potential to enhance prostate cancer germline testing for African men
Source: Springer Nature journal article supplement (doi:10.1038/s41467-025-57312-9), 2025-03-10
Supplement: MOESM1 [file 41467_2025_57312_MOESM1_ESM.pdf]

# Rare pathogenic structural variants show potential to enhance prostate cancer germline testing for African men

Tingting Gong, Jue Jiang, Korawich Uthayopas, M.S. Riana Bornman, Kazzem Gheybi, Phillip D. Stricker, Joachim Weischenfeldt, Shingai B. A. Mutambirwa, Weerachai Jaratlerdsiri and Vanessa M. Hayes

## Supplementary Information

### Supplementary Tables

**Supplementary Table 1.** Clinical and pathological characteristics of 170 prostate cancer patients included in this study

| Variables                            |              | Prostate Cancer patients                  |                              |
|--------------------------------------|--------------|-------------------------------------------|------------------------------|
| Ancestral group                      |              | African                                   | European                     |
| Number of patients                   |              | 113                                       | 57                           |
| Country of origin                    | South Africa | 113                                       | 4                            |
|                                      | Australia    | 0                                         | 53                           |
| Mean age                             |              | 67 (45-99,<br>Std dev = 8.4) <sup>3</sup> | 62 (46-72,<br>Std dev = 6.0) |
| Median preoperative PSA <sup>1</sup> |              | 244 (4.3 – 4847) <sup>4</sup>             | 9.4 (3.5 – 31.8)             |
| PSA>20 ng/mL*                        |              | 65                                        | 40                           |
| PSA≤20 ng/mL                         |              | 36                                        | 17                           |
| ISUP GG <sup>2</sup>                 | 1            | 8                                         | 7                            |
|                                      | 2            | 10                                        | 0                            |
|                                      | 3            | 12                                        | 0                            |
|                                      | 4*           | 42                                        | 9                            |
|                                      | 5*           | 39                                        | 40                           |
|                                      | unknown      | 2                                         | 1                            |

<sup>1</sup>PSA: Prostate Specific Antigen (ng/mL).

<sup>2</sup>ISUP GG: International Society of Urological Pathology Group Grading.

<sup>3</sup>One patient in African ancestry has no record of age.

<sup>4</sup>Twelve patients in African ancestry have no record of exact PSA.

\*NCCN inclusion criteria for high-risk/very high-risk PCa defined by ISUP GG/PSA

**Supplementary Table 2.** The count of germline SVs discovered and genotyped in each ancestral group.

| SV filtering criteria             | Population | Total              | DEL                | DUP              | INS               | INV            | TRA            |
|-----------------------------------|------------|--------------------|--------------------|------------------|-------------------|----------------|----------------|
| High-quality SV calls             | African    | 38,668<br>(18,674) | 22,423<br>(10,846) | 2,155<br>(1,160) | 11,797<br>(5,350) | 1,189<br>(758) | 1,104<br>(560) |
|                                   | European   | 24,292<br>(4,298)  | 14,377<br>(2,800)  | 1,385<br>(390)   | 7,169<br>(722)    | 685<br>(254)   | 676<br>(132)   |
|                                   | All        | 42,966             | 25,223             | 2,545            | 12,519            | 1,443          | 1,236          |
| High-quality genotype calls       | African    | 28,515<br>(19,114) | 16,903<br>(11,508) | 1,451<br>(1,246) | 8,350<br>(5,152)  | 1,033<br>(720) | 778<br>(488)   |
|                                   | European   | 14,129<br>(4,728)  | 8,519<br>(3,124)   | 688<br>(483)     | 3,961<br>(763)    | 550<br>(237)   | 411<br>(121)   |
|                                   | All        | 33,243             | 20,027             | 1,934            | 9,113             | 1,270          | 899            |
| Gene-disruptive and MAF $\leq$ 5% | African    | 1,407<br>(1,314)   | 747<br>(711)       | 86<br>(84)       | 74<br>(68)        | 156<br>(151)   | 344<br>(300)   |
|                                   | European   | 543<br>(450)       | 294<br>(258)       | 50<br>(48)       | 20<br>(14)        | 44<br>(39)     | 135<br>(91)    |
|                                   | All        | 1,857              | 1,005              | 134              | 88                | 195            | 435            |

\*Private SVs in bracket

**Supplementary Table 3.** Control population identified gene-disruptive SVs defined as PP-SV or impacting the same gene as PP-SV in PCa patients.

| Genes                        | Gene impact type <sup>1</sup> | chrom1 | pos1        | chrom2 | pos2        | SV type | MAF in control population <sup>2</sup> |
|------------------------------|-------------------------------|--------|-------------|--------|-------------|---------|----------------------------------------|
| <i>OCA2</i>                  | pLoF                          | chr15  | 28,017,719  | chr15  | 28,020,677  | DEL     | 0.02                                   |
| <i>DNAH9</i> – <i>OCA2</i>   | pLoF                          | chr17  | 11,694,612  | chr15  | 27,913,931  | TRA     | 0.29                                   |
| <i>BARD1</i>                 | pLoF                          | chr2   | 214,726,966 | chr2   | 214,727,028 | DEL     | 0.12                                   |
| <i>BTBD7</i> - <i>SLC2A5</i> | pLoF                          | chr14  | 93,246,136  | chr1   | 9,061,394   | TRA     | 0.17                                   |

<sup>1</sup> Gene impact type based on gene annotation. pLoF: Potential loss-of-function. CG: Copy gain. IED: Intragenic Exon Duplication.

<sup>2</sup> Minor Allele Frequency (MAF) of SVs were estimated based on high-quality genotype calls only (detail in Methods).

**Supplementary Table 4.** The count of SVs with unknown classification in ClinVar or absent from dbVar scored by SV impact prediction tools.

| Tool                              | Total SVs | DEL | DUP | INS | INV | TRA |
|-----------------------------------|-----------|-----|-----|-----|-----|-----|
| StrVCTVRE                         | 409       | 353 | 56  | 0   | 0   | 0   |
| CADD-SV                           | 1,180     | 976 | 124 | 80  | 0   | 0   |
| POSTRE                            | 1,590     | 969 | 122 | 0   | 97  | 402 |
| PhenoSV                           | 1,796     | 972 | 128 | 87  | 190 | 419 |
| Scored by all three tools         | 398       | 343 | 55  | 0   | 0   | 0   |
| StrVCTVRE Score $\geq 0.37$       | 136       | 114 | 22  | 0   | 0   | 0   |
| CADD-SV Score $\geq 10$           | 194       | 164 | 16  | 14  | 0   | 0   |
| POSTRE Score $\geq 0.8$           | 264       | 38  | 7   | 0   | 17  | 201 |
| PhenoSV score $\geq 0.5$          | 640       | 179 | 30  | 2   | 82  | 347 |
| PASS thresholds of any two tools* | 291       | 107 | 16  | 0   | 11  | 157 |
| PASS thresholds of all four tools | 2         | 2   | 0   | 0   | 0   | 0   |

\*Our study criteria to define pathogenic candidate SVs.

**Supplementary Table 5.** Criteria to predict and establish the potential pathogenicity of SVs

| SV types | Criteria to define PP-SV candidates <sup>1</sup> |                             |                         |                          | PP-SV candidate count |                  |        |
|----------|--------------------------------------------------|-----------------------------|-------------------------|--------------------------|-----------------------|------------------|--------|
|          | CADD-SV score $\geq 10$                          | StrVCTVRE score $\geq 0.37$ | POSTRE score $\geq 0.8$ | PhenoSV score $\geq 0.5$ | African-private       | European-private | Shared |
| DEL      | ✓                                                | ✓                           | ✓                       | ✓                        | 67                    | 39               | 1      |
| DUP      | ✓                                                | ✓                           | ✓                       | ✓                        | 7                     | 9                | 0      |
| INS      | ×                                                | ✓                           | ×                       | ✓                        | 0                     | 0                | 0      |
| INV      | ×                                                | ×                           | ✓                       | ✓                        | 9                     | 2                | 0      |
| TRA      | ×                                                | ×                           | ✓                       | ✓                        | 107                   | 38               | 12     |

<sup>1</sup>Potential Pathogenic candidate DEL or DUP were required to meet two of the criteria.

**Supplementary Table 6.** Pathogenic scores computed by SV impact prediction tools for SVs in ClinVar.

| chrom | start     | end       | SV type | ClinVar Significance   | StrVCTVRE<br>score | CADD-SV<br>score | POSTRE<br>score | PhenoSV<br>score |
|-------|-----------|-----------|---------|------------------------|--------------------|------------------|-----------------|------------------|
| chr2  | 44281377  | 44281612  | DUP     | Likely pathogenic      | <b>0.54</b>        | <b>10.68</b>     | 0.75            | <b>0.99</b>      |
| chr15 | 28017719  | 28020677  | DEL     | Likely pathogenic      | <b>0.58</b>        | 4.3              | <b>0.88</b>     | <b>0.56</b>      |
| chr18 | 62152637  | 62157701  | DEL     | Pathogenic             | <b>0.62</b>        | 7.5              | 0.67            | <b>0.94</b>      |
| chr1  | 231184145 | 231186249 | DEL     | Benign                 | NA                 | 4.4              | 0.75            | 0.31             |
| chr2  | 132488843 | 132490840 | DEL     | Benign                 | NA                 | 4.8              | 0.15            | 0.03             |
| chr3  | 130413180 | 130414060 | DEL     | Benign                 | <b>0.48</b>        | 7.0              | 0.75            | 0.39             |
| chr5  | 177098012 | 177102222 | DEL     | Benign                 | 0.07               | <b>12.8</b>      | 0.63            | 0.02             |
| chr9  | 6672237   | 6675374   | DEL     | Benign                 | NA                 | 4.7              | 0.5             | 0.35             |
| chr9  | 133252413 | 133258230 | DEL     | Benign                 | <b>0.44</b>        | 0.89             | 0.49            | 0.03             |
| chr10 | 52766742  | 52769474  | DEL     | Benign                 | 0.18               | 5.1              | 0               | <b>0.53</b>      |
| chr12 | 3461663   | 3463037   | DEL     | Benign                 | NA                 | 3.5              | 0.33            | <b>0.52</b>      |
| chr15 | 33864126  | 33864212  | DUP     | Uncertain significance | <b>0.55</b>        | 9.6              | 0.33            | <b>0.97</b>      |
| chr17 | 73749723  | 73751769  | DEL     | Benign                 | NA                 | <b>17.1</b>      | 0.5             | 0.16             |
| chr18 | 56089793  | 56090590  | DEL     | Benign                 | NA                 | 4.3              | 0.63            | 0.20             |

\*Scores in bold indicate meeting the criterion of individual SV impact prediction tool for pathogenicity as defined by our study.

**Supplementary Table 7.** Literature review on tumour suppressor or oncogenic effect of genes disrupted by cancer-related PP-SV candidates.

| <b>Gene name</b> | <b>SV type</b> | <b>Potential impact in cancer</b> | <b>Cancer type</b>                                               | <b>Reference</b>   |
|------------------|----------------|-----------------------------------|------------------------------------------------------------------|--------------------|
| <i>ATAD2</i>     | DEL            | Oncogenic effect                  | Multiple cancers                                                 | 1                  |
| <i>F5</i>        | DEL            | Oncogenic effect                  | Gastric cancer and PCa                                           | 2, 3               |
| <i>HDAC9</i>     | DEL            | Oncogenic effect                  | Multiple cancers                                                 | 4, 5               |
| <i>FKBP9</i>     | DEL            | Oncogenic effect                  | PCa and glioblastoma                                             | 6, 7               |
| <i>ADAM2</i>     | DEL            | Oncogenic effect                  | Lung cancer                                                      | 8                  |
| <i>GGA2</i>      | DEL            | Oncogenic effect                  | Lung cancer                                                      | 9                  |
| <i>SELP</i>      | DEL            | Oncogenic effect                  | glioblastoma                                                     | 10                 |
| <i>OAS3</i>      | DEL            | Oncogenic effect                  | Multiple cancers                                                 | 11                 |
| <i>CYRZ</i>      | DEL            | Unknown                           | DNA methylation-driven gene in PCa                               | 12                 |
| <i>TULP2</i>     | DEL            | Unknown                           | Breast cancer associated gene in Genome-wide association studies | 13                 |
| <i>BCKDHB</i>    | DEL            | Unknown                           | Downregulation in breast cancer                                  | 14                 |
| <i>SLC7A2</i>    | DEL            | Tumour suppressor                 | Ovarian cancer and lung cancer                                   | 15, 16             |
| <i>DNAJC15</i>   | DEL            | Tumour suppressor                 | Breast cancer                                                    | 17                 |
| <i>BCL2L11</i>   | DEL            | Tumour suppressor                 | Gastric cancer                                                   | 18                 |
| <i>BARD1</i>     | DEL            | DNA damage repair gene            | Multiple cancers                                                 | 19                 |
| <i>COL4A2</i>    | DUP            | Oncogenic effect                  | Gastric cancer and breast cancer                                 | 20, 21             |
| <i>BIRC6</i>     | DUP            | Oncogenic effect                  | PCa, lung cancer and breast cancer                               | 22, 23, 24, 25     |
| <i>LTBP1</i>     | DUP            | Oncogenic effect                  | Lymphoma, PCa, Esophageal squamous cell carcinoma, breast cancer | 26, 27, 28, 29, 30 |
|                  |                | Tumour suppressor                 | Cervical cancer                                                  | 30                 |
| <i>SLC2A5</i>    | DUP            | Oncogenic effect                  | Multiple cancers                                                 | 31                 |
| <i>MLH1</i>      | INV            | DNA mismatch repair gene          | PCa and Lynch syndrome                                           | 32, 33             |
| <i>RB1</i>       | INV            | Tumour suppressor                 | PCa                                                              | 34                 |
| <i>WASF1</i>     | INV            | Tumour suppressor                 | PCa                                                              | 35                 |
| <i>FOXP1</i>     | INV            | Tumour suppressor                 | PCa                                                              | 36, 37             |

|               |     |                   |                                                                        |            |
|---------------|-----|-------------------|------------------------------------------------------------------------|------------|
| <i>NSD3</i>   | INV | Oncogenic effect  | Multiple cancers                                                       | 38, 39     |
| <i>GRM8</i>   | TRA | Oncogenic effect  | PCa                                                                    | 40         |
| <i>WDR43</i>  | TRA | Oncogenic effect  | Colorectal cancer and lung cancer                                      | 41, 42, 43 |
| <i>NPM1</i>   | TRA | Oncogenic effect  | PCa and lung cancer                                                    | 44, 45, 46 |
| <i>NUSAP1</i> | TRA | Oncogenic effect  | PCa                                                                    | 47         |
| <i>MECOM</i>  | TRA | Oncogenic effect  | Multiple cancers                                                       | 48, 49     |
| <i>PKHD1</i>  | TRA | Oncogenic effect  | Colon cancer                                                           | 50         |
|               |     | Tumour suppressor | Colorectal cancer                                                      | 51         |
| <i>CTNNA1</i> | TRA | Tumour suppressor | Multiple cancers                                                       | 52         |
| <i>PHC3</i>   | TRA | Tumour suppressor | PCa                                                                    | 53         |
| <i>PRKACA</i> | TRA | Oncogenic effect  | Adrenocortical cancer                                                  | 54         |
| <i>KCTD3</i>  | TRA | Unknown           | Mutation associated with neurogenetic and neurodevelopmental disorders | 55         |
| <i>DST</i>    | TRA | Tumour suppressor | Breast cancer                                                          | 56         |
| <i>AK8</i>    | TRA | Tumour suppressor | Uterine Carcinosarcoma                                                 | 57         |

**Supplementary Table 8.** Variant allele frequency (VAF) measurements for PP-SVs

| Gene name            | SV type | chrom1 | pos1      | chrom2 | pos2      | Patient ID | Altered read count | Total read count <sup>1</sup> | VAF  |
|----------------------|---------|--------|-----------|--------|-----------|------------|--------------------|-------------------------------|------|
| <i>SLC3A1</i>        | DUP     | chr2   | 44281377  | chr2   | 44281612  | N0001      | 19.1               | 57.8                          | 0.33 |
|                      |         | chr2   | 44281377  | chr2   | 44281612  | SMU094     | 16.3               | 54.6                          | 0.30 |
| <i>OCA2</i>          | DEL     | chr15  | 28017719  | chr15  | 28020677  | N0059      | 15.5               | 34.2                          | 0.45 |
| <i>PIGN</i>          | DEL     | chr18  | 62152637  | chr18  | 62157701  | SMU083     | 17.4               | 34.2                          | 0.51 |
| <i>SLC7A2</i>        | DEL     | chr8   | 17418976  | chr8   | 17544122  | UP2035     | 21.0               | 43.4                          | 0.48 |
|                      |         | chr8   | 17418976  | chr8   | 17544122  | KAL0054    | 15.6               | 31.6                          | 0.49 |
| <i>DNAJC15</i>       | DEL     | chr13  | 43078470  | chr13  | 43079390  | 17135      | 19.6               | 40.4                          | 0.48 |
| <i>BCL2L11</i>       | DEL     | chr2   | 111122626 | chr2   | 111125901 | KAL0101    | 17.8               | 39.7                          | 0.45 |
| <i>BARD1</i>         | DEL     | chr2   | 214768022 | chr2   | 214772899 | N0073      | 15.1               | 31.2                          | 0.49 |
| <i>COL4A2/COL4A1</i> | DUP     | chr13  | 110294204 | chr13  | 110633815 | UP2039     | 20.5               | 58.6                          | 0.35 |
| <i>SLC2A5</i>        | DUP     | chr1   | 9045605   | chr1   | 9049441   | 11099      | 23.7               | 73.8                          | 0.33 |
| <i>FOXP1</i>         | INV     | chr3   | 71097066  | chr3   | 74525618  | UP2101     | 20.3               | 44.4                          | 0.41 |
|                      |         | chr3   | 71097066  | chr3   | 74525618  | N0084      | 16.0               | 39.1                          | 0.41 |
| <i>WASF1</i>         | INV     | chr6   | 108167886 | chr6   | 110172775 | N0048      | 17.5               | 54.2                          | 0.32 |
| <i>MLH1</i>          | INV     | chr3   | 37000362  | chr3   | 39352689  | SMU080     | 13.5               | 31.2                          | 0.43 |
| <i>RB1</i>           | INV     | chr13  | 48466588  | chr13  | 48473911  | SMU064     | 12.0               | 32.3                          | 0.37 |
| <i>CTNNA1</i>        | TRA     | chr5   | 138903881 | chr19  | 21614900  | 13179      | 19.5               | 38.6                          | 0.50 |
| <i>AK8-DST</i>       | TRA     | chr9   | 132876361 | chr6   | 56896165  | 11452      | 17.7               | 37.9                          | 0.47 |
| <i>LTBP1/BIRC6</i>   | DUP     | chr2   | 32403832  | chr2   | 33107415  | 5287       | 23.1               | 59.7                          | 0.39 |
| <i>PHC3-PRKACA</i>   | TRA     | chr3   | 170090742 | chr19  | 14110142  | SMU061     | 22.5               | 45.7                          | 0.49 |
| <i>KCTD3-DST</i>     | TRA     | chr1   | 215567414 | chr6   | 56652607  | UP2039     | 16.0               | 40.3                          | 0.40 |
|                      |         | chr1   | 215567414 | chr6   | 56652607  | SMU101     | 20.0               | 47.3                          | 0.42 |
| <i>PKHD1</i>         | TRA     | chr6   | 51981375  | chr15  | 30874073  | N0056      | 18.0               | 50.6                          | 0.36 |
|                      |         | chr6   | 51981375  | chr15  | 30874073  | SMU196     | 23.0               | 58.8                          | 0.39 |

<sup>1</sup>For DEL, the total read count is the average read depth of 10 kbp upstream and downstream of DEL region. For DUP, total read count is the average read depth of DUP region. For INV and TRA, total read count is defined as average read depth of  $\pm 150$  bp region to breakpoints.



**Supplementary Table 9.** Second somatic hit in tumour-matched samples from PP-SV presenting patients.

| <b>chrom</b> | <b>start</b> | <b>end</b>  | <b>gene</b>         | <b>Patient ID</b> | <b>GISTIC<br/>predicted copy<br/>number value</b> |
|--------------|--------------|-------------|---------------------|-------------------|---------------------------------------------------|
| chr2         | 43470330     | 44640339    | <i>SLC3A1</i>       | SMU094            | -1                                                |
| chr15        | 27,017,069   | 27,907,116  | <i>OCA2</i>         | N0059             | 2                                                 |
| chr8         | 17,424,247   | 17,544,245  | <i>SLC7A2</i>       | UP2035            | -1                                                |
| chr3         | 70,951,922   | 72,671,968  | <i>FOXP1</i>        | UP2101            | 1                                                 |
| chr6         | 109,780,912  | 110,170,915 | <i>WASF1</i>        | N0048             | 2                                                 |
| chr2         | 32,400,246   | 33,110,251  | <i>LTBP1, BIRC6</i> | 5287              | 2                                                 |
| chr1         | 215,538,501  | 215,618,505 | <i>KCTD3</i>        | UP2039            | -1                                                |
| chr6         | 56,313,745   | 56,623,766  | <i>DST</i>          | UP2039            | -1                                                |
| chr6         | 51,563,429   | 52,363,482  | <i>PKHD1</i>        | N0056             | 1                                                 |

**Supplementary Table 10.** Sequencing depth of coverage in identified potentially pathogenic DEL or DUP regions.

| Gene name                       | chrom1 | pos1      | chrom2 | pos2      | SV type | Sample  | Average depth in SV region (X) | Average depth in 10 kb upstream of SV region (X) | Average depth in 10 kb downstream of SV region (X) |
|---------------------------------|--------|-----------|--------|-----------|---------|---------|--------------------------------|--------------------------------------------------|----------------------------------------------------|
| <i>SLC3A1</i>                   | chr2   | 44281377  | chr2   | 44281612  | DUP     | N0001   | 57.8                           | 39.0                                             | 38.5                                               |
|                                 |        |           |        |           |         | SMU094  | 54.6                           | 38.6                                             | 37.9                                               |
| <i>OCA2</i>                     | chr15  | 28017719  | chr15  | 28020677  | DEL     | N0059   | 18.7                           | 33.6                                             | 34.9                                               |
| <i>PIGN</i>                     | chr18  | 62152637  | chr18  | 62157701  | DEL     | SMU083  | 16.7                           | 33.9                                             | 34.3                                               |
| <i>SLC7A2</i>                   | chr8   | 17418976  | chr8   | 17544122  | DEL     | UP2035  | 22.4                           | 43.6                                             | 43.2                                               |
|                                 |        |           |        |           |         | KAL0054 | 16.0                           | 32.3                                             | 30.9                                               |
| <i>DNAJC15</i>                  | chr13  | 43078470  | chr13  | 43079390  | DEL     | 17135   | 20.8                           | 41.2                                             | 39.5                                               |
| <i>BCL2L11</i>                  | chr2   | 111122626 | chr2   | 111125901 | DEL     | KAL0101 | 21.9                           | 43.8                                             | 35.6                                               |
| <i>BARD1</i>                    | chr2   | 214768022 | chr2   | 214772899 | DEL     | N0073   | 16.1                           | 30.9                                             | 31.5                                               |
| <i>COL4A2/</i><br><i>COL4A1</i> | chr13  | 110294204 | chr13  | 110633815 | DUP     | UP2039  | 58.6                           | 37.7                                             | 38.5                                               |
| <i>SLC2A5</i>                   | chr1   | 9045605   | chr1   | 9049441   | DUP     | 11099   | 73.8                           | 51.0                                             | 48.9                                               |
| <i>LTBP1/</i><br><i>BIRC6</i>   | chr2   | 32403832  | chr2   | 33107415  | DUP     | 5287    | 59.7                           | 35.3                                             | 38.0                                               |

## Supplementary Figures

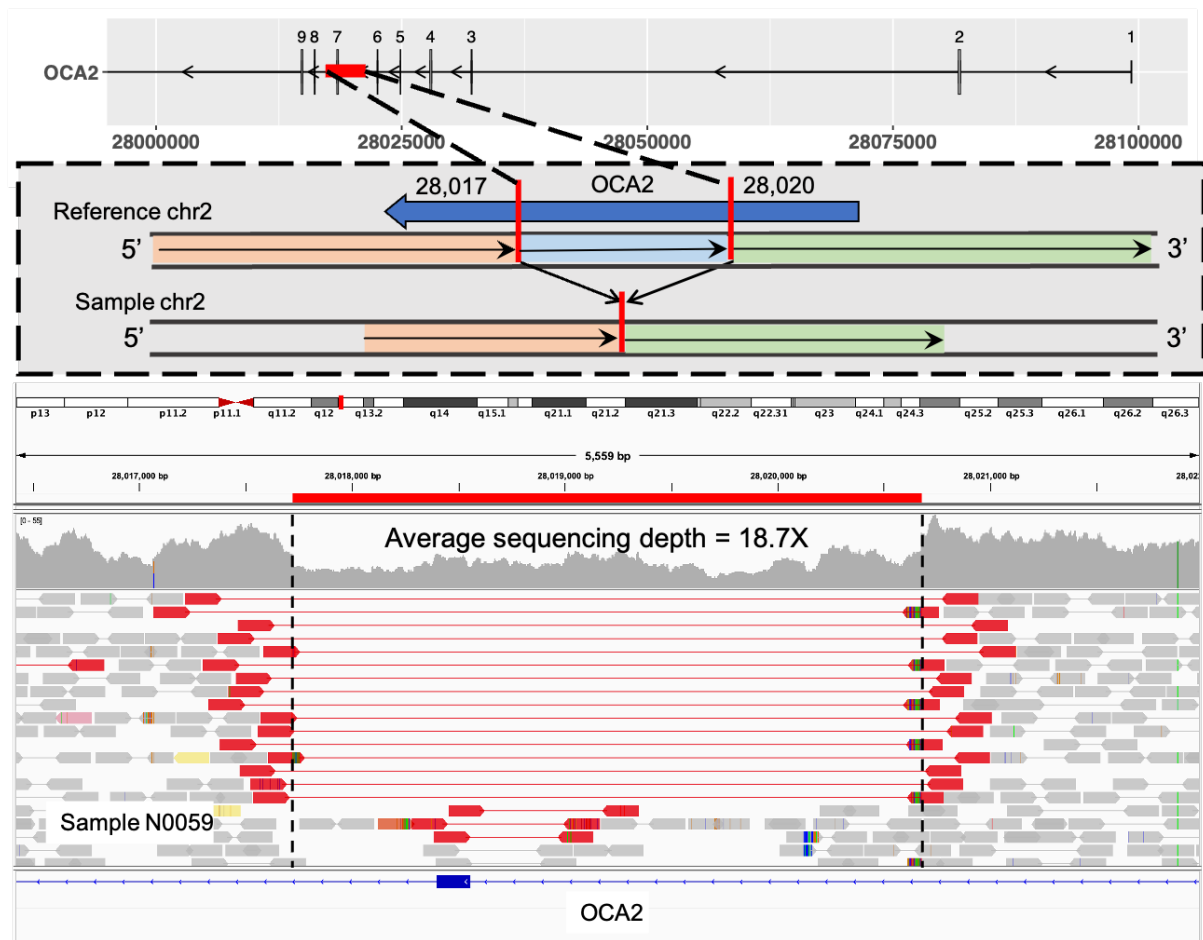

**Supplementary Figure 1. *OCA2* pLoF deletion reported as “likely pathogenic” in ClinVar.** Top row shows transcript structure of *OCA2* and deletion region highlighted in red. Middle row shows the DEL schematic diagram. Bottom row shows the sequencing read depth and alignments in DEL region using Integrative Genomic Viewer. Both the discordantly aligned read-pairs (red) and split-reads (soft-clipped bases in rainbow colour) support the existence of the DEL and its breakpoints. DEL breakpoints are shown in dashed black vertical lines.

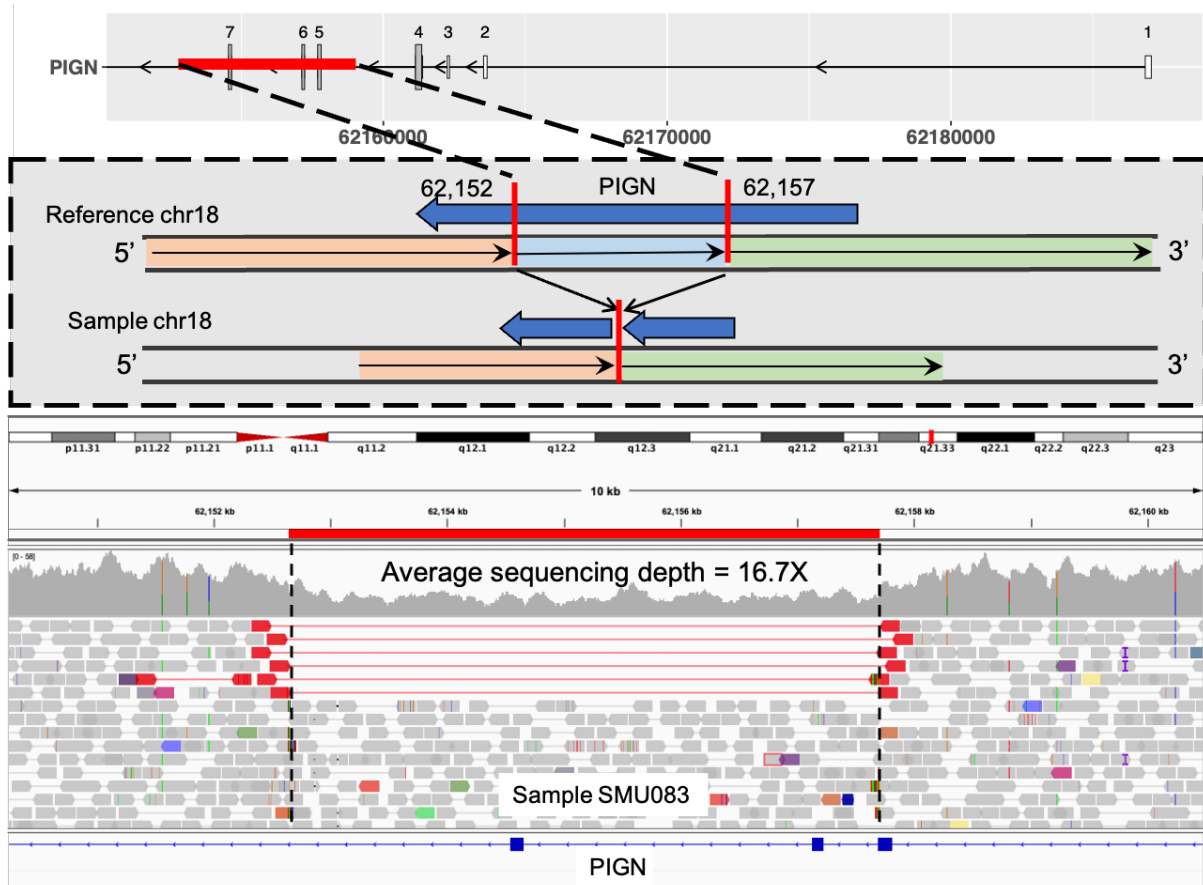

**Supplementary Figure 2. *PIGN* pLoF deletion reported as “pathogenic” in ClinVar.** Top row shows transcript structure of *PIGN* and deletion region highlighted in red. Middle row shows the DEL schematic diagram. Bottom row shows the sequencing read depth and alignments in DEL region using Integrative Genomic Viewer. Both the discordantly aligned read-pairs (red) and split-reads (soft-clipped bases in rainbow colour) support the existence of the DEL and its breakpoints. DEL breakpoints are shown in dashed black vertical lines.

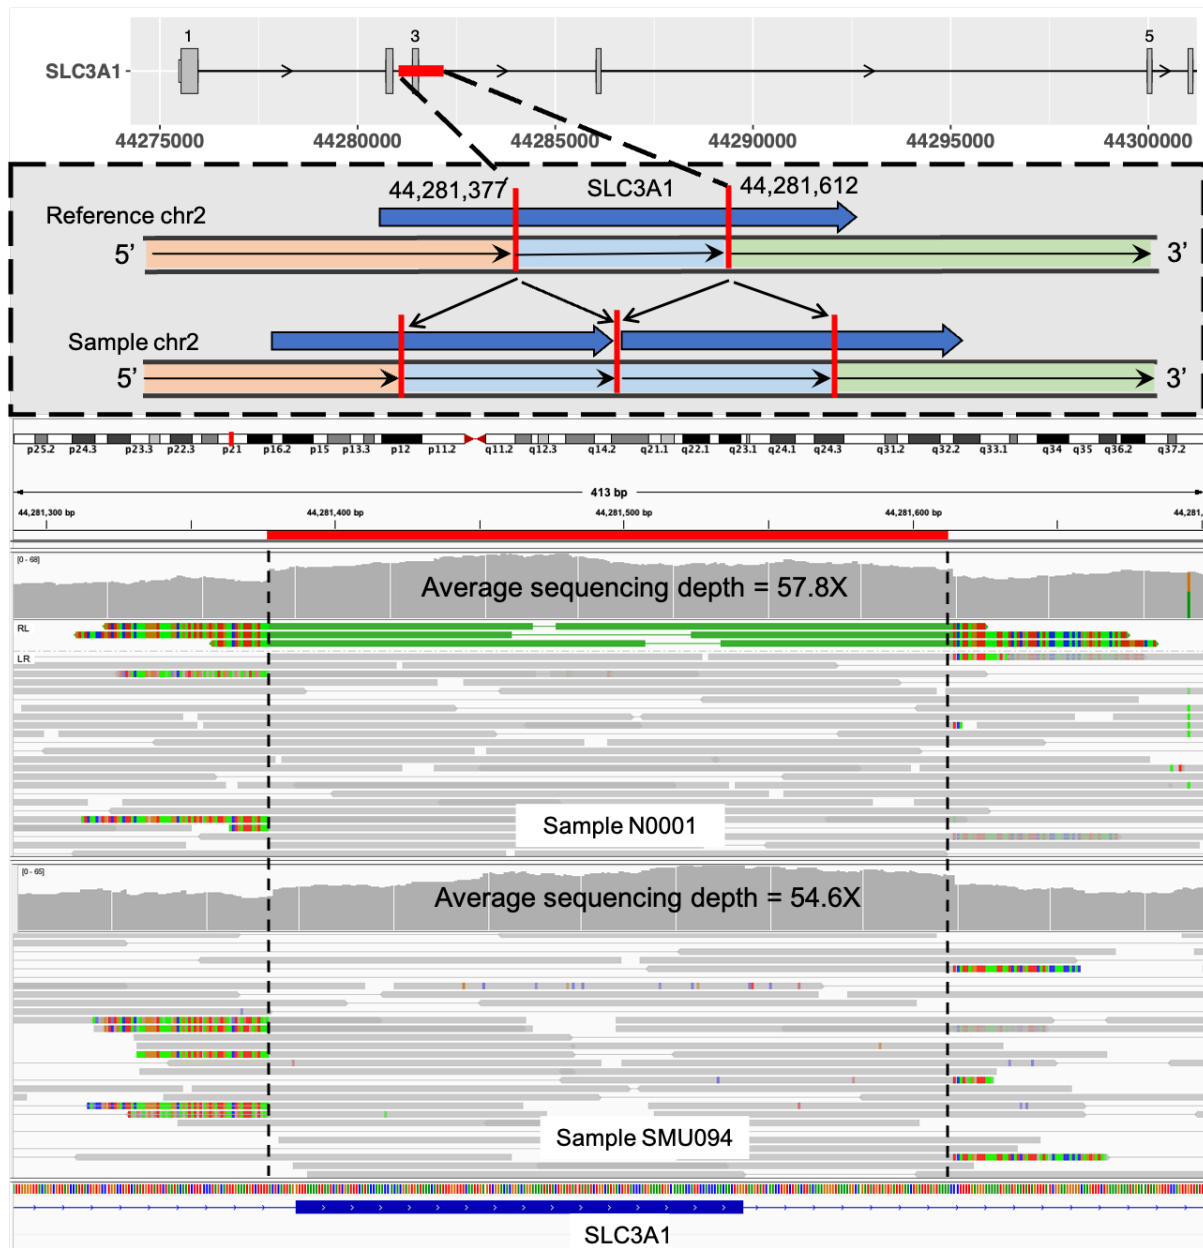

**Supplementary Figure 3. *SLC3A1* intragenic exon duplication reported as “likely pathogenic” in ClinVar.** Top row shows transcript structure of *SLC3A1* and DUP region highlighted in blue. Bottom row shows DUP supporting read-pairs (green) by visual inspection of aligned sequencing data using Integrative Genomic Viewer. DUP supporting read-pairs were not observed for sample SMU094, while higher coverage in the DUP region was observed.

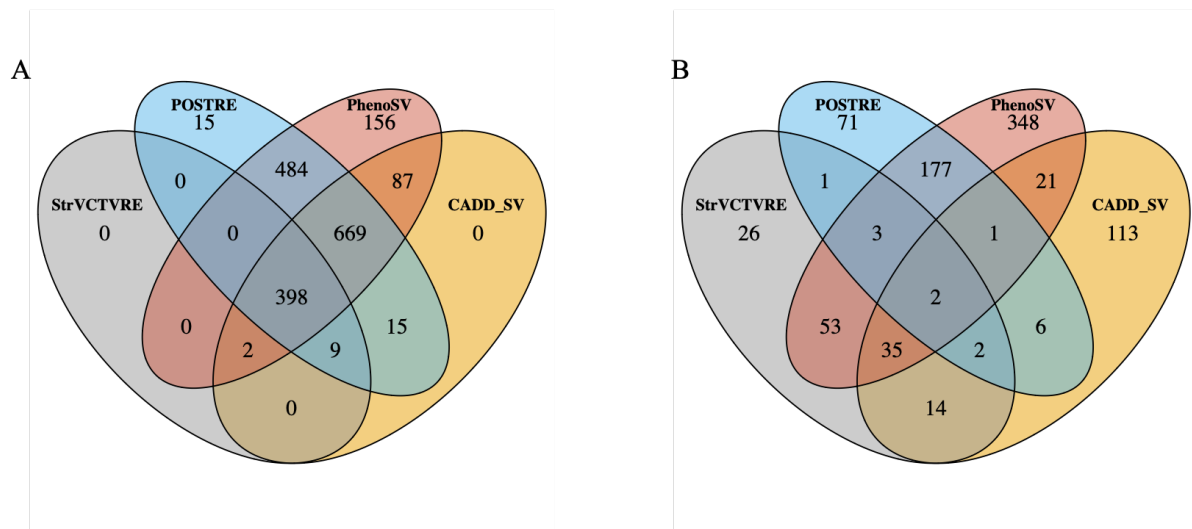

**Supplementary Figure 4. Low-frequency gene-disruptive SVs with unknown classification in ClinVar or absent from dbVar scored by SV impact prediction tools. (A) Count of all scored SVs. (B) Count of SVs with CADD-SV score  $\geq 10$ , StrVCTVRE score  $\geq 0.37$ , POSTRE score  $\geq 0.8$  or PhenoSV score  $\geq 0.5$ . Source data are provided as a Source Data file.**

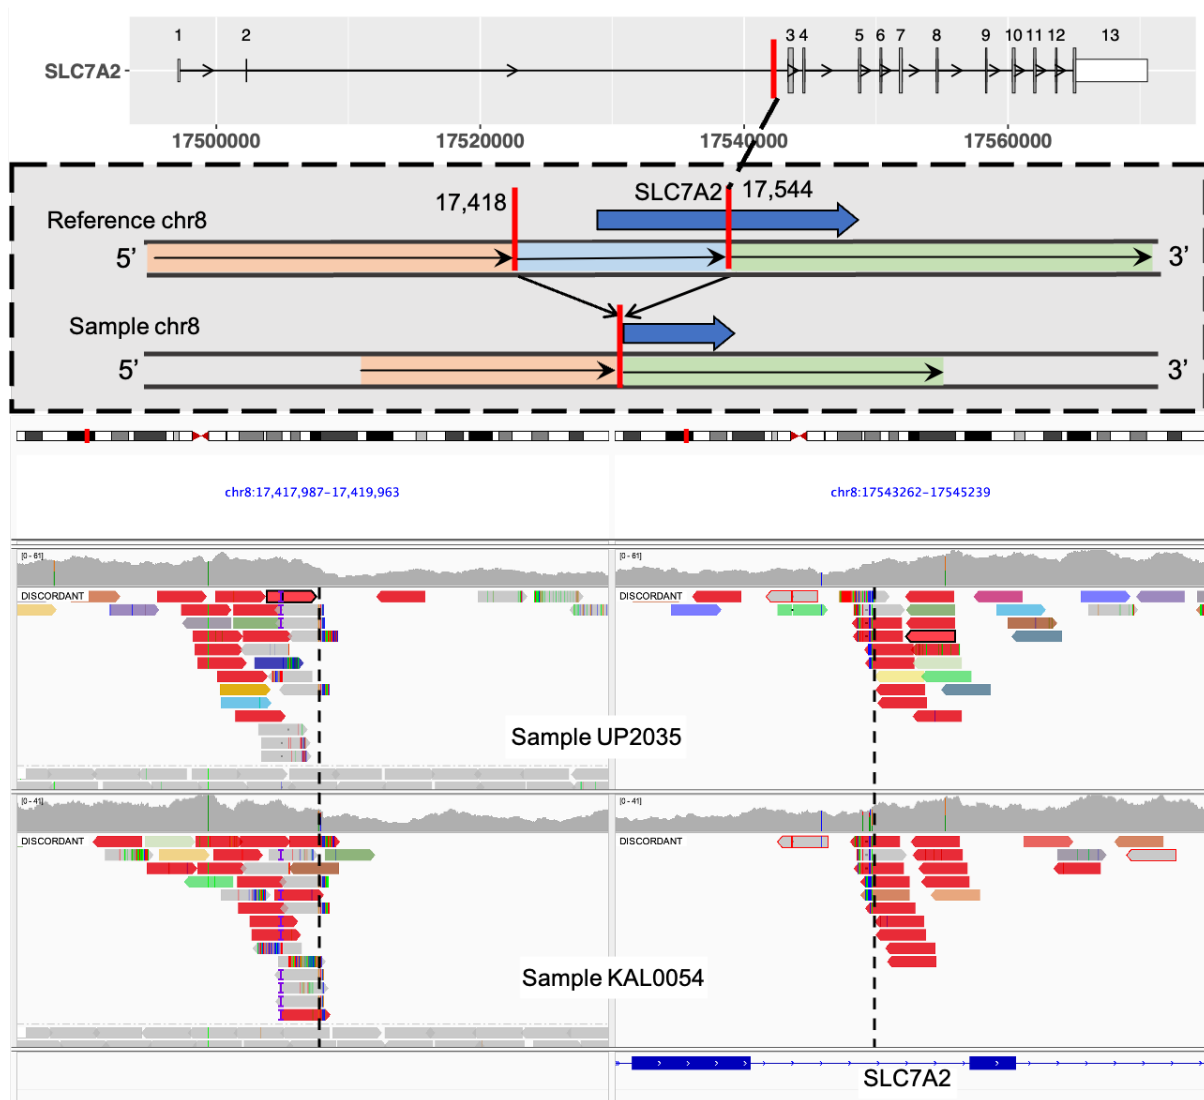

**Supplementary Figure 5. *SLC7A2* pLoF deletion identified as potentially pathogenic SV.** Top row shows transcript structure of *SLC7A2* and DEL breakpoint in red. Middle row shows the DEL schematic diagram. Bottom row shows the sequencing read depth and alignments around DEL breakpoints using Integrative Genomic Viewer. Both the discordantly aligned read-pairs (red) and split-reads (soft-clipped bases in rainbow colour) support the existence of the DEL and its breakpoints. DEL breakpoints are shown in dashed black vertical lines.

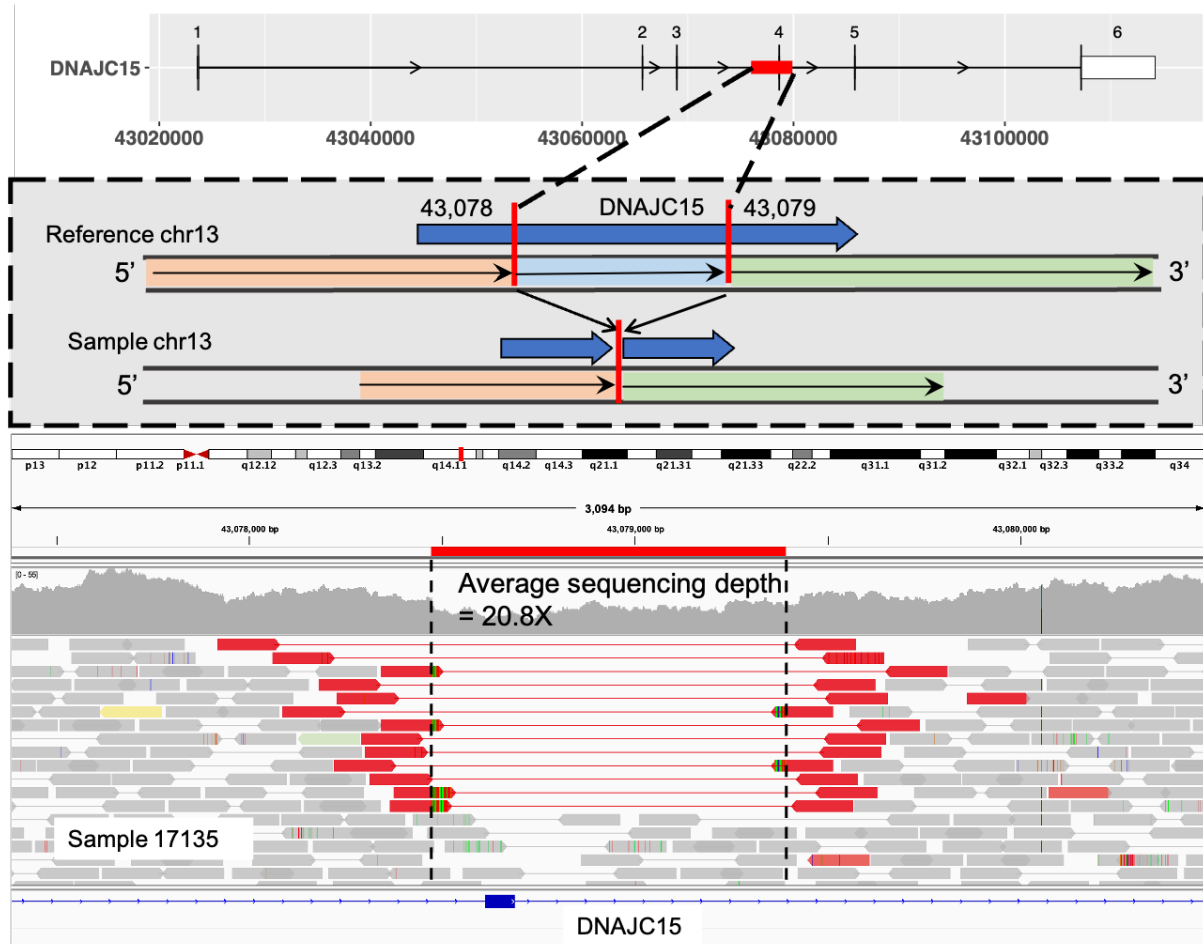

**Supplementary Figure 6. *DNAJC15* pLoF deletion identified as potentially pathogenic SV.** Top row shows transcript structure of *DNAJC15* with DEL region highlighted in read. Middle row shows the DEL schematic diagram. Bottom row shows the sequencing read depth and alignments in DEL region using Integrative Genomic Viewer. Both the discordantly aligned read-pairs (red) and split-reads (soft-clipped bases in rainbow colour) support the existence of the DEL and its breakpoints. DEL breakpoints are shown in dashed black vertical lines.



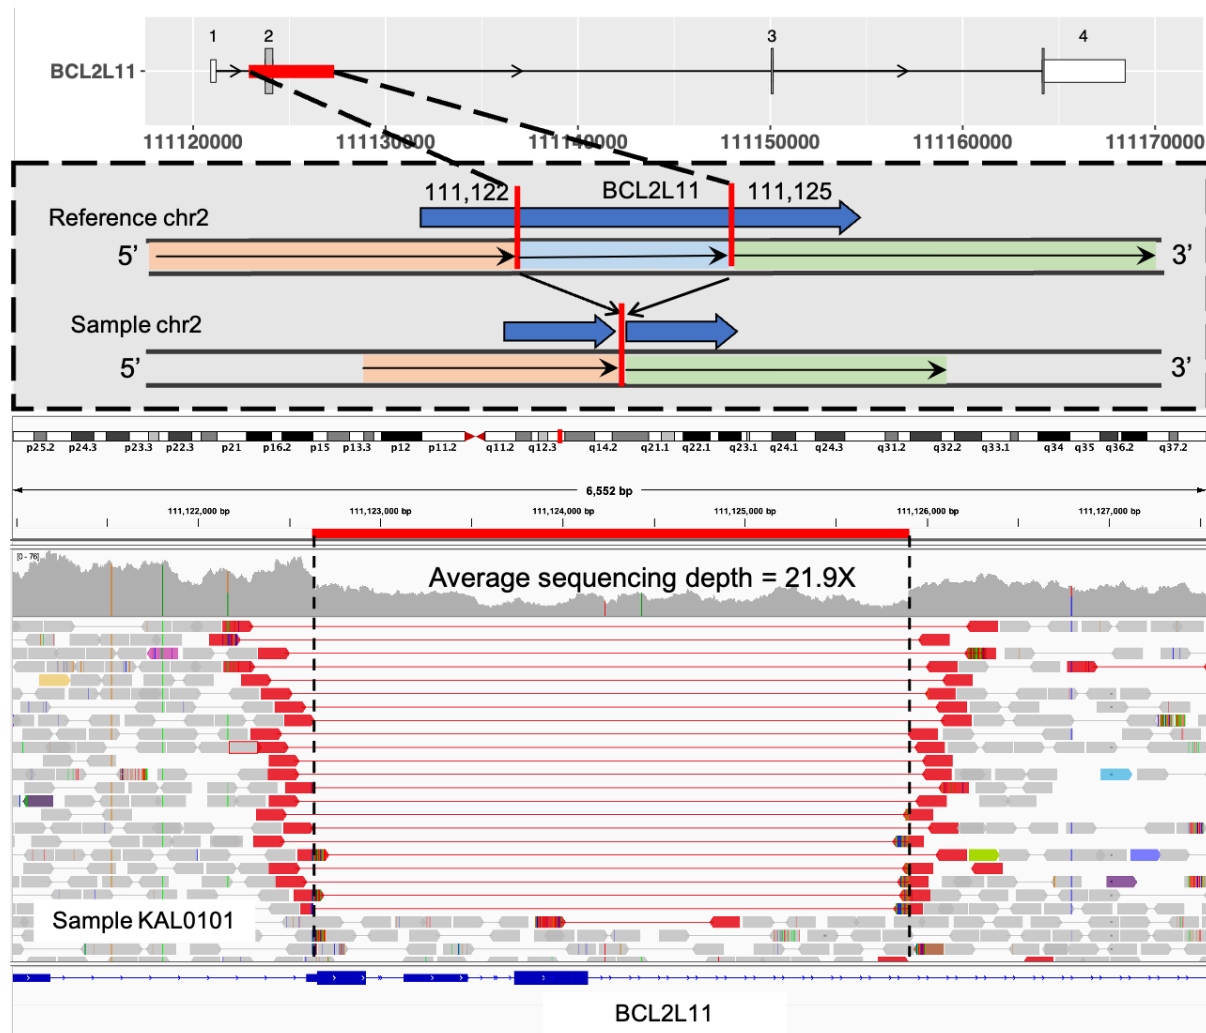

**Supplementary Figure 7. *BCL2L11* pLoF deletion identified as potentially pathogenic SV.** Top row shows transcript structure of *BCL2L11* with DEL region highlighted in read. Middle row shows the DEL schematic diagram. Bottom row shows the sequencing read depth and alignments in DEL region using Integrative Genomic Viewer. Both the discordantly aligned read-pairs (red) and split-reads (soft-clipped bases in rainbow colour) support the existence of the DEL and its breakpoints. DEL breakpoints are shown in dashed black vertical lines.

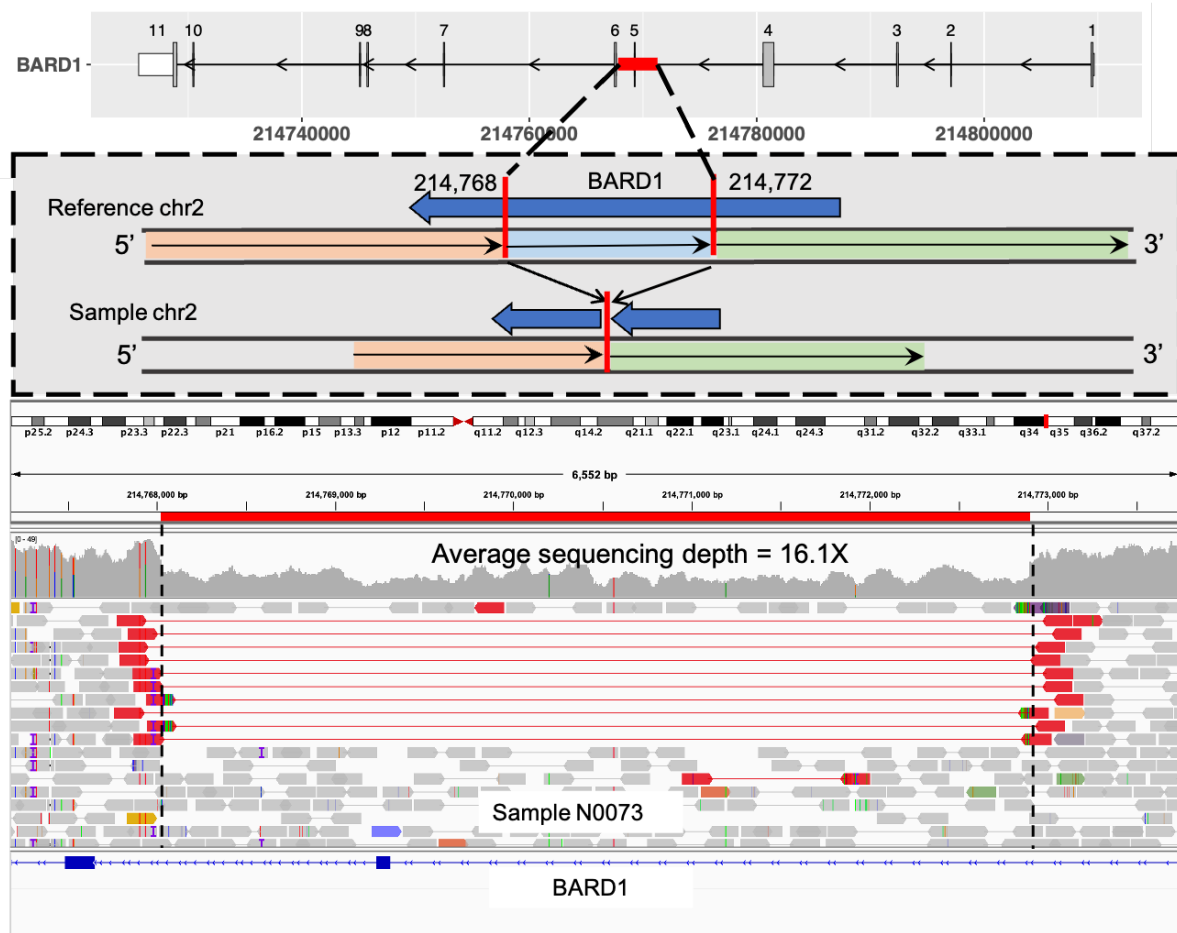

**Supplementary Figure 8. *BARD1* pLoF deletion identified as potentially pathogenic SV.** Top row shows transcript structure of *BARD1* with DEL region highlighted in red. Middle row shows the DEL schematic diagram. Bottom row shows the sequencing read depth and alignments in DEL region using Integrative Genomic Viewer. Both the discordantly aligned read-pairs (red) and split-reads (soft-clipped bases in rainbow colour) support the existence of the DEL and its breakpoints. DEL breakpoints are shown in dashed black vertical lines.

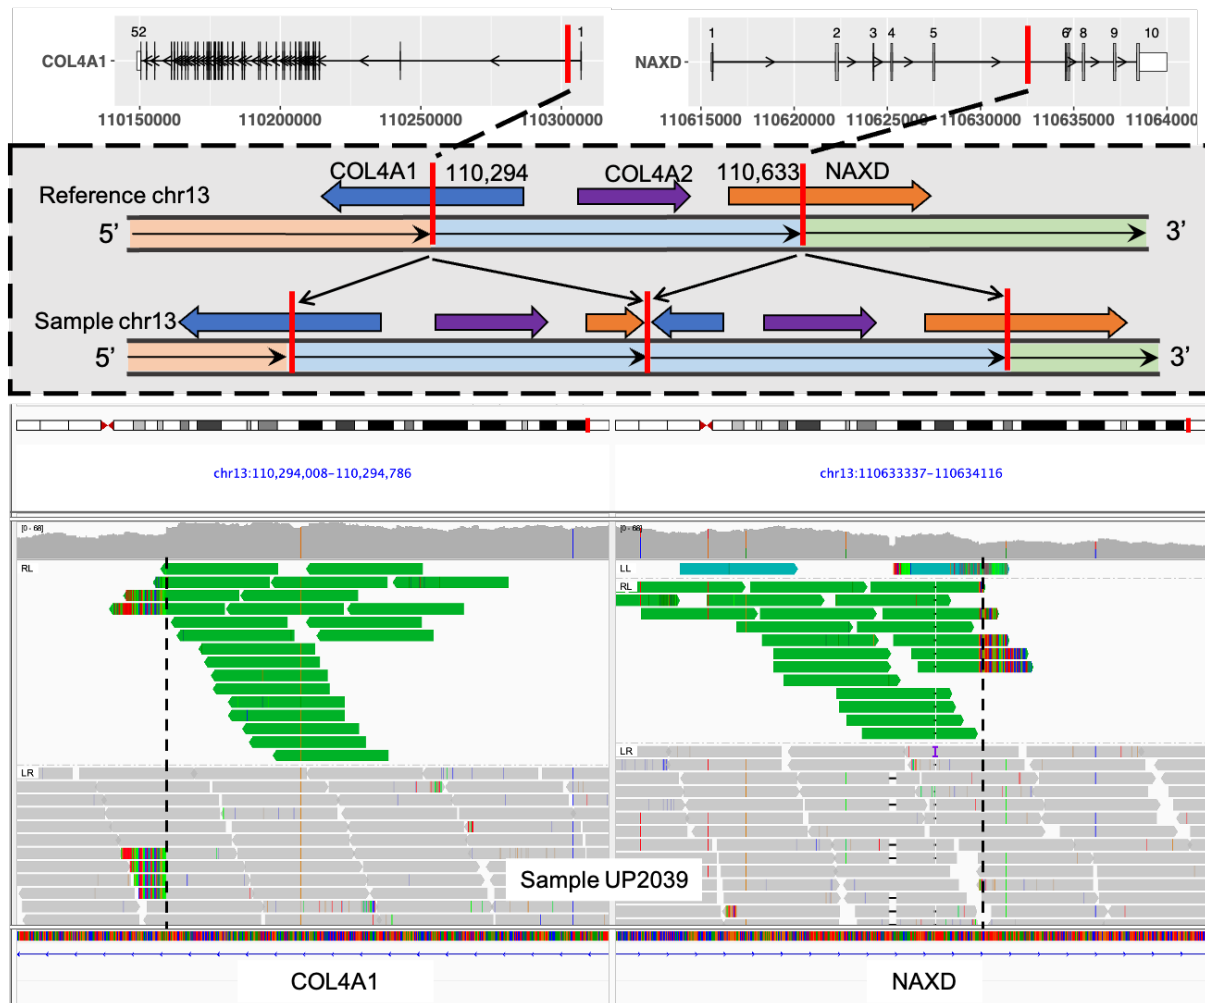

**Supplementary Figure 9. *COL4A2* whole-gene DUP identified as potentially pathogenic SV.** This dbVar reported 339,611 base DUP with breakpoints disrupting *COL4A1* and *NAXD*. Top row shows transcript structure of *COL4A1* and *NAXD*, and DUP breakpoints in red. Middle row shows the DUP schematic diagram. Bottom row shows the sequencing read depth and alignments around DUP breakpoints using Integrative Genomic Viewer. Both the discordantly aligned read-pairs (green) and split-reads (soft-clipped bases in rainbow colour) support the existence of the DUP and its breakpoints. DUP breakpoints are shown in dashed black vertical lines.

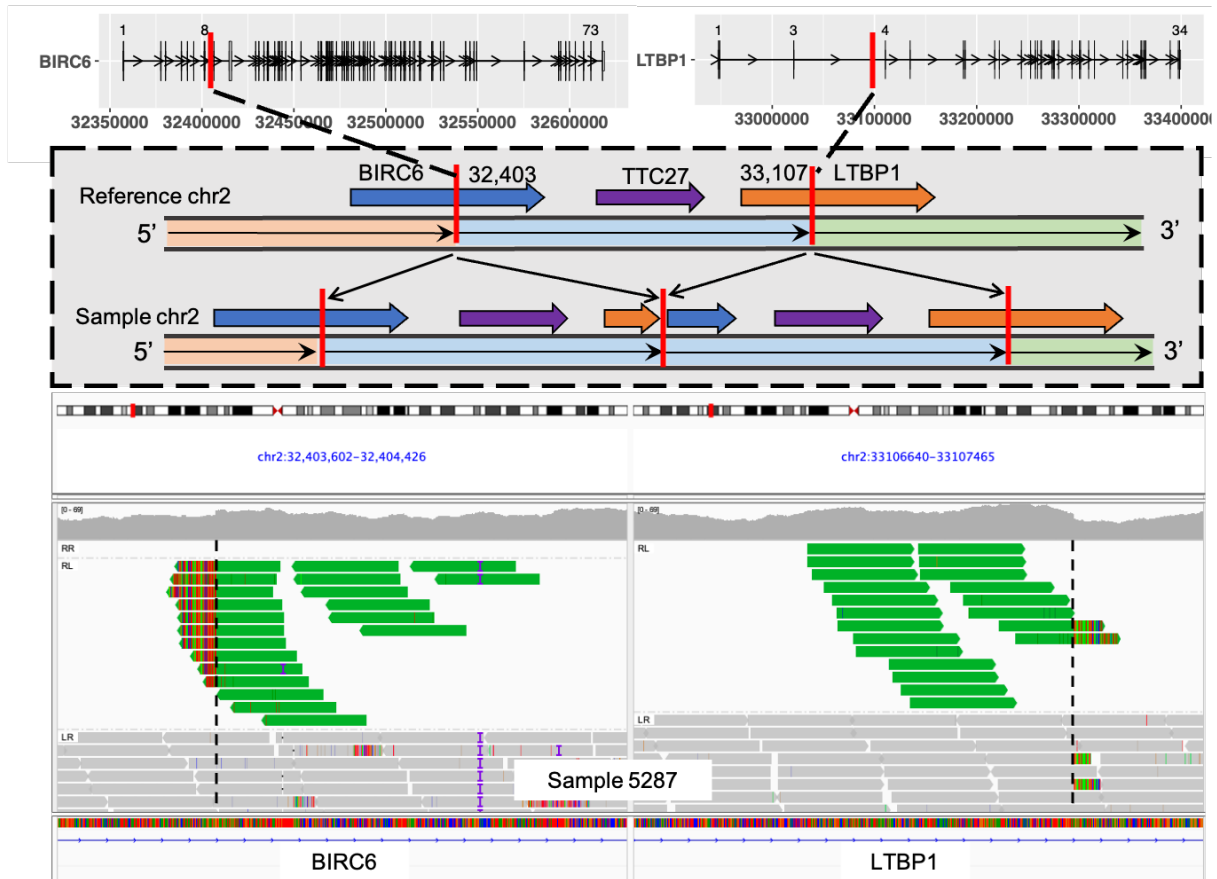

**Supplementary Figure 10. Whole-gene DUP identified as “cautionary” potentially pathogenic SV.** This dbVar reported 703,583 base DUP with breakpoints disrupting *LTBP1* and *BIRC6*. Top row shows transcript structure of *LTBP1* and *BIRC6*, and DUP breakpoints in red. Middle row shows the DUP schematic diagram. Bottom row shows the sequencing read depth and alignments around DUP breakpoints using Integrative Genomic Viewer. Both the discordantly aligned read-pairs (green) and split-reads (soft-clipped bases in rainbow colour) support the existence of the DUP and its breakpoints. DUP breakpoints are shown in dashed black vertical lines.

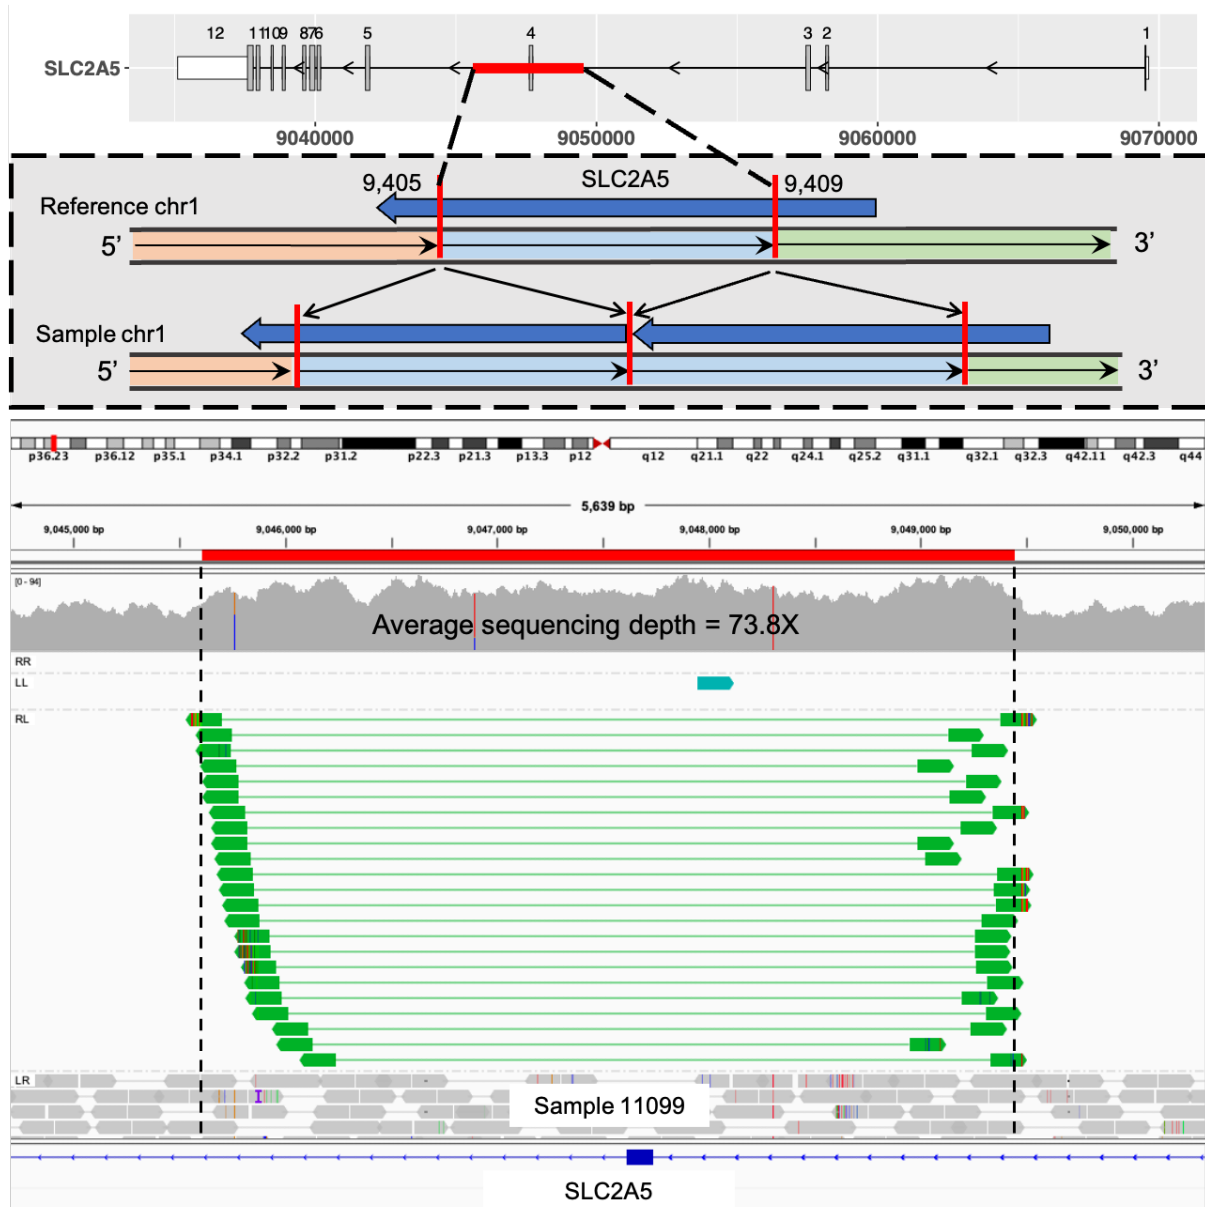

**Supplementary Figure 11. *SLC2A5* intragenic exon DUP identified as potentially pathogenic SV.** Top row shows transcript structure of *SLC2A5*, with DUP region in red. Middle row shows the DUP schematic diagram. Bottom row shows the sequencing read depth and alignments in DUP region using Integrative Genomic Viewer. Both the discordantly aligned read-pairs (green) and split-reads (soft-clipped bases in rainbow colour) support the existence of the DUP and its breakpoints. DUP breakpoints are shown in dashed black vertical lines.

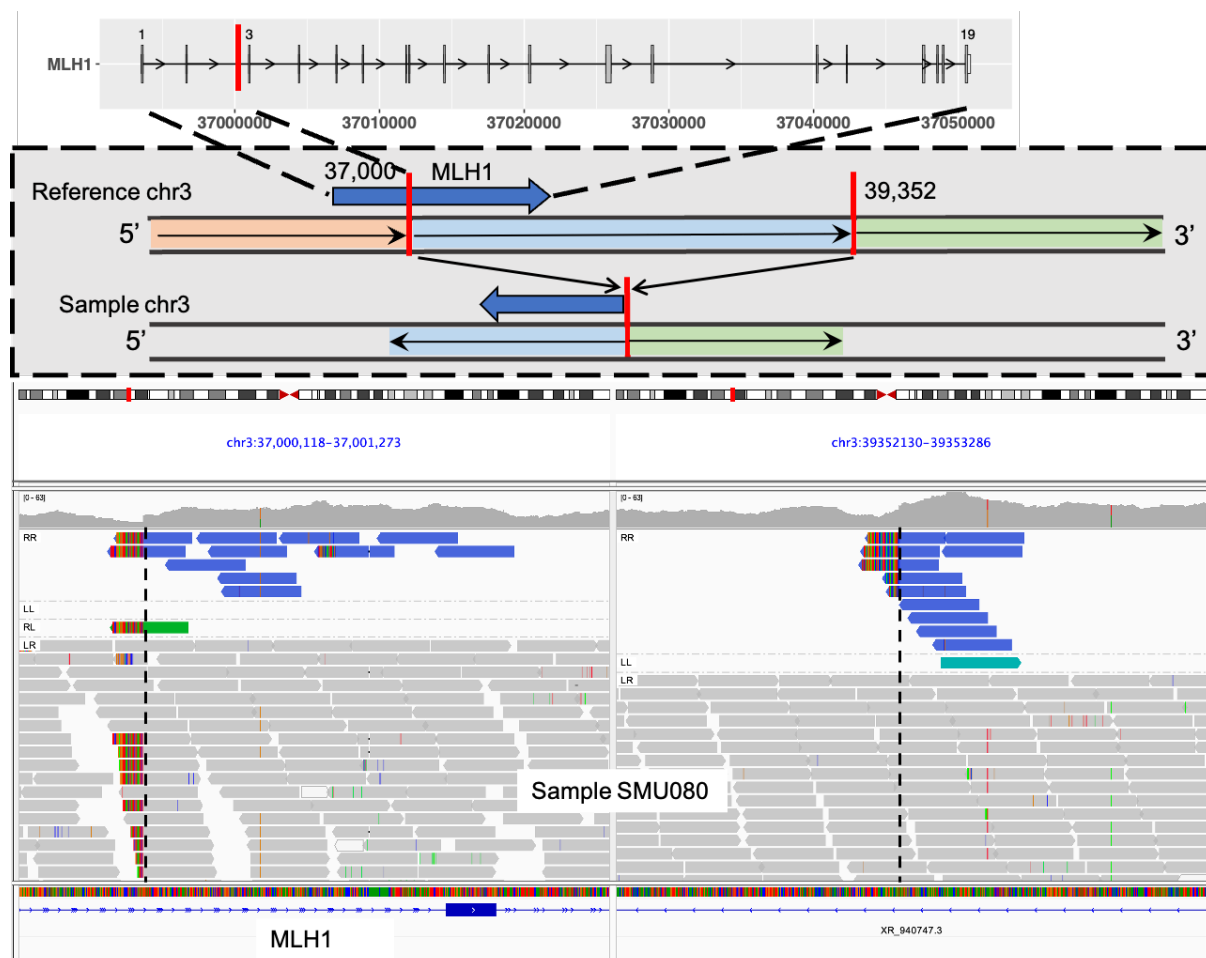

**Supplementary Figure 12. *MLH1* pLoF inversion identified as potentially pathogenic SV.** Top row shows transcript structure of *MLH1* and INV breakpoint in red. Middle row shows the INV schematic diagram. Bottom row shows the sequencing read depth and alignments around INV breakpoints using Integrative Genomic Viewer. Both the discordantly aligned read-pairs (blue) and split-reads (soft-clipped bases in rainbow colour) show the existence of the INV and its breakpoints. INV breakpoints are shown in dashed black vertical lines.

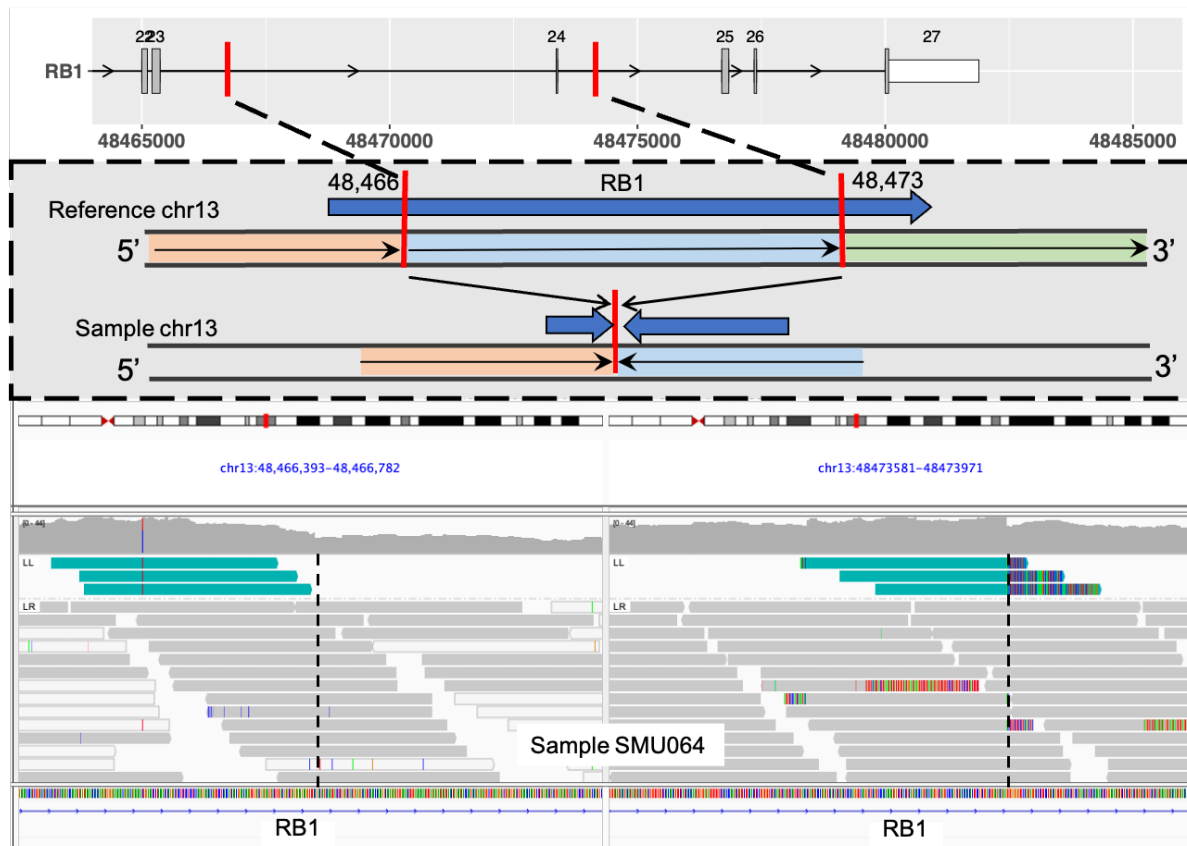

**Supplementary Figure 13. *RB1* pLoF inversion identified as potentially pathogenic SV.** Top row shows transcript structure of *RB1* and INV breakpoint in red. Middle row shows the INV schematic diagram. Bottom row shows the sequencing read depth and alignments around INV breakpoints using Integrative Genomic Viewer. Both the discordantly aligned read-pairs (cyan) and split-reads (soft-clipped bases in rainbow colour) show the existence of the INV and its breakpoints. INV breakpoints are shown in dashed black vertical lines.

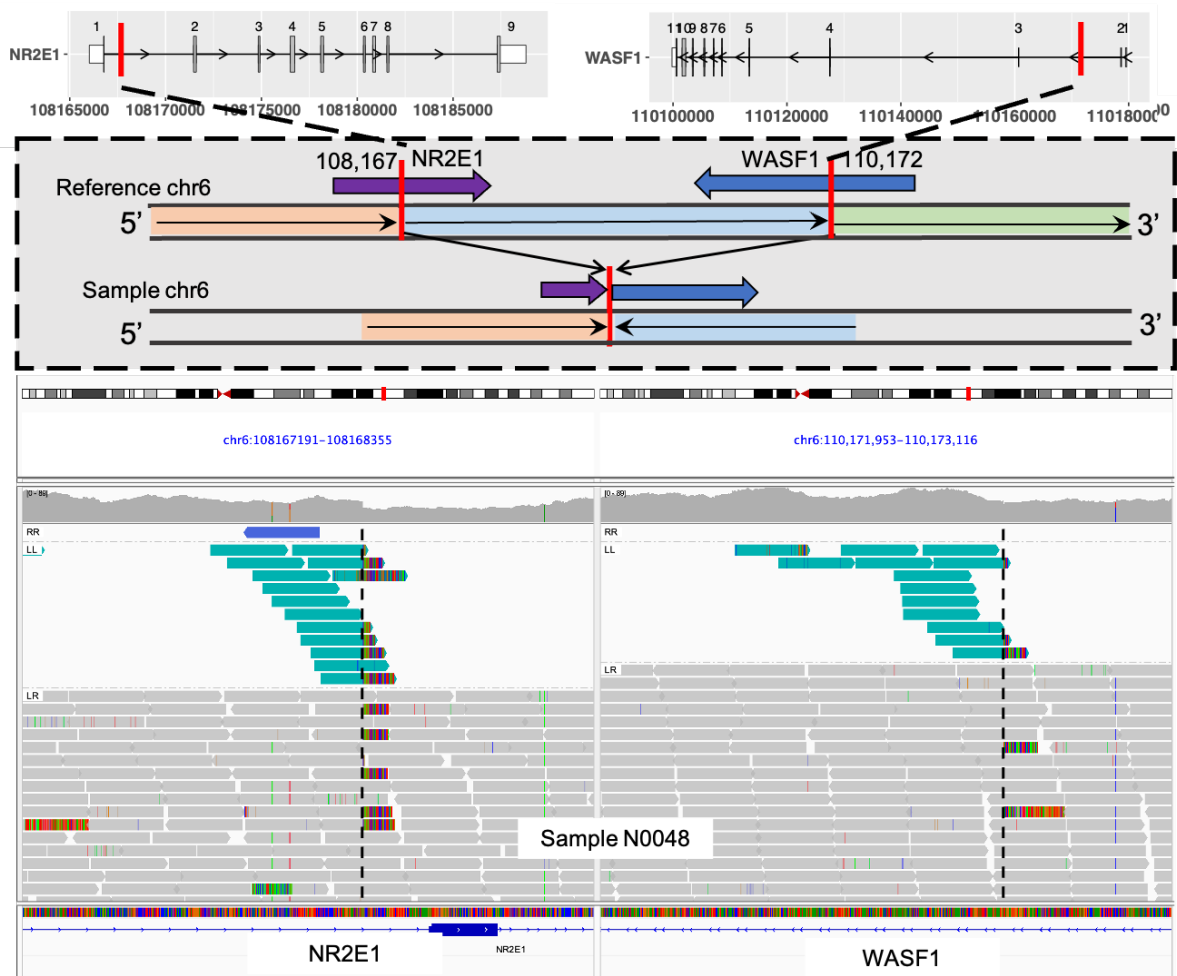

**Supplementary Figure 14. *WASF1* pLoF inversion identified as potentially pathogenic SV.** Top row shows transcript structure of *WASF1* and *NR2E1* and INV breakpoint in red. Middle row shows the INV schematic diagram. Bottom row shows the sequencing read depth and alignments around INV breakpoints using Integrative Genomic Viewer. Both the discordantly aligned read-pairs (cyan) and split-reads (soft-clipped bases in rainbow colour) show the existence of the INV and its breakpoints. INV breakpoints are shown in dashed black vertical lines.



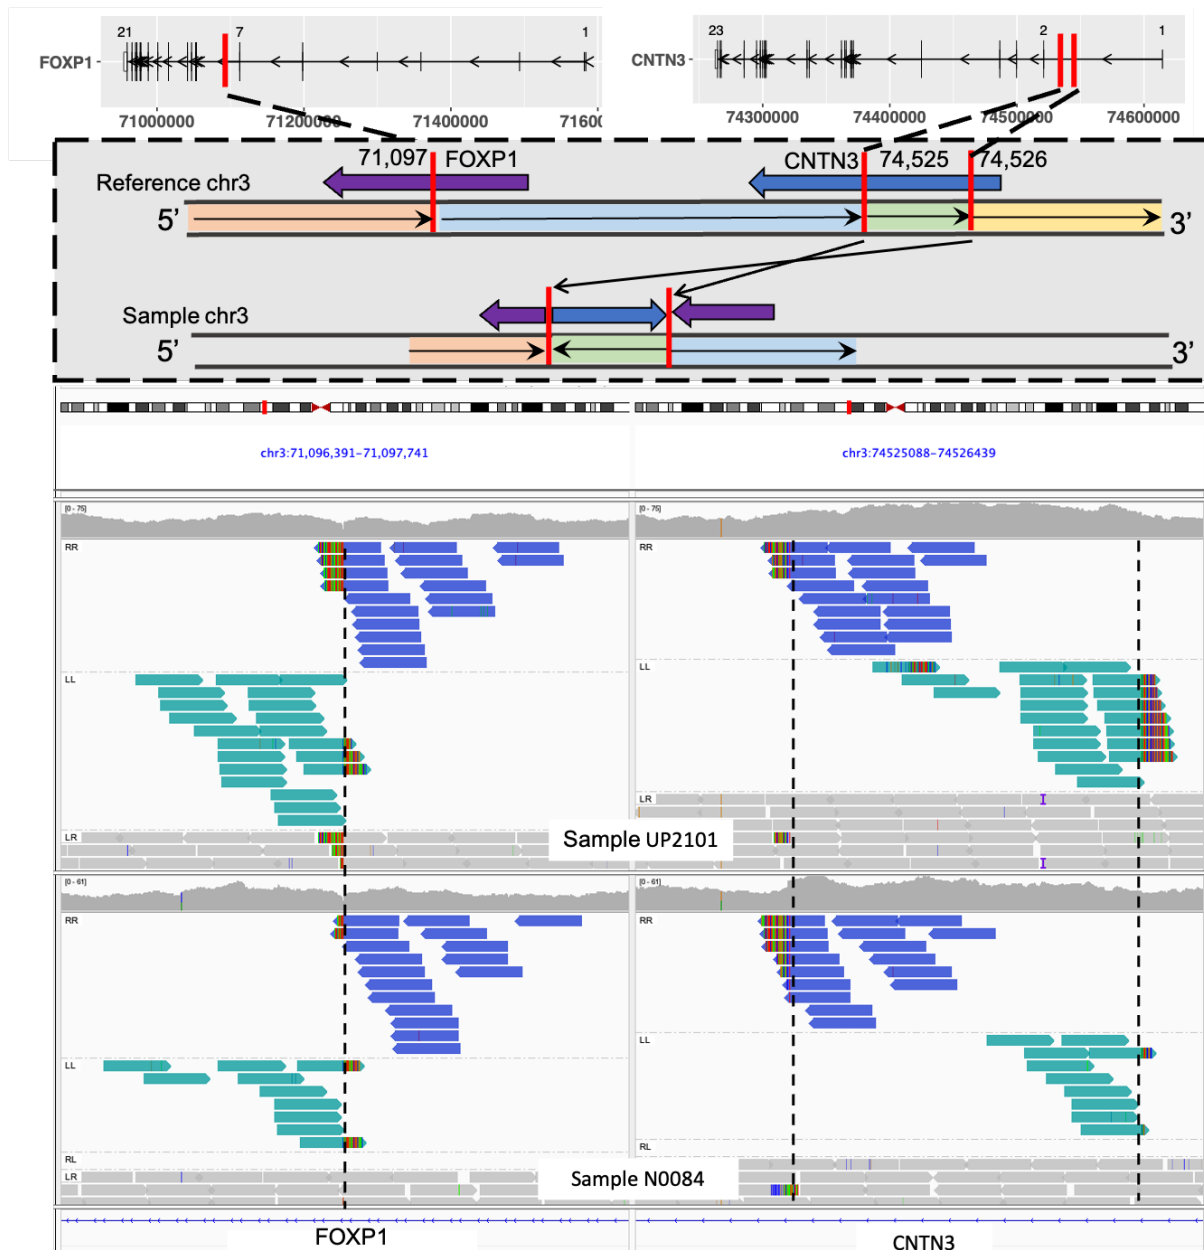

**Supplementary Figure 15. *FOXPI* pLoF inversion identified as potentially pathogenic SV.** Top row shows transcript structure of *FOXPI* and *CNTN3* and INV breakpoint in red. Middle row shows the INV schematic diagram. Bottom row shows the sequencing read depth and alignments around INV breakpoints using Integrative Genomic Viewer. Both the discordantly aligned read-pairs (blue and cyan) and split-reads (soft-clipped bases in rainbow colour) support the existence of the INV and its breakpoints. INV breakpoints are shown in dashed black vertical lines.

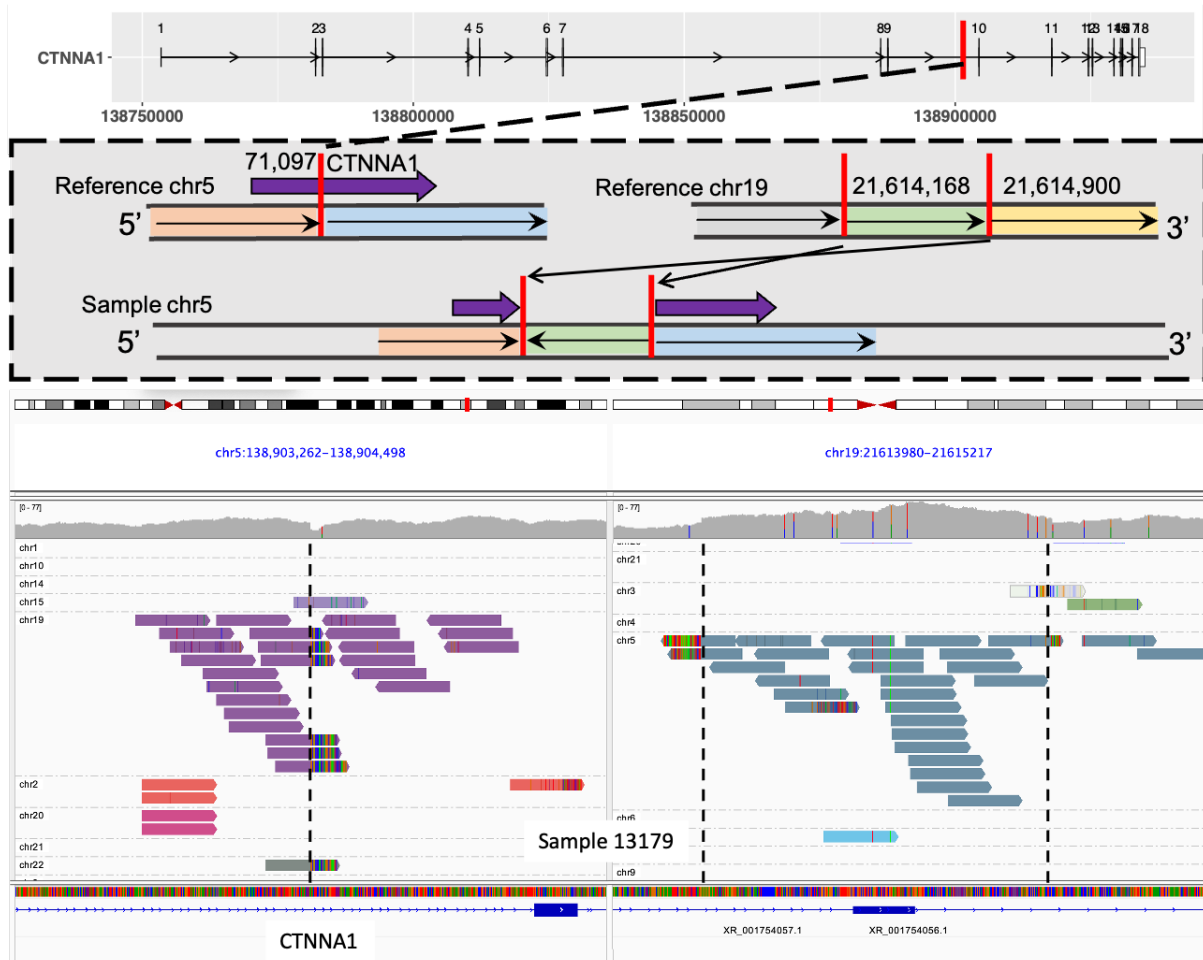

**Supplementary Figure 16. *CTNNA1* translocation identified as potentially pathogenic SV.** Top row shows transcript structure of *CTNNA1* and TRA breakpoint in red. Middle row shows the TRA schematic diagram. Bottom row shows the sequencing read depth and read alignments around TRA breakpoints using Integrative Genomic Viewer. Both the discordantly aligned read-pairs (purple and grey) and split-reads (soft-clipped bases in rainbow colour) support the existence of the TRA and its breakpoints. Sequencing reads with mate aligned to chr19 are in purple and reads with mate aligned to chr5 are in grey. TRA breakpoints are shown in dashed black vertical lines.

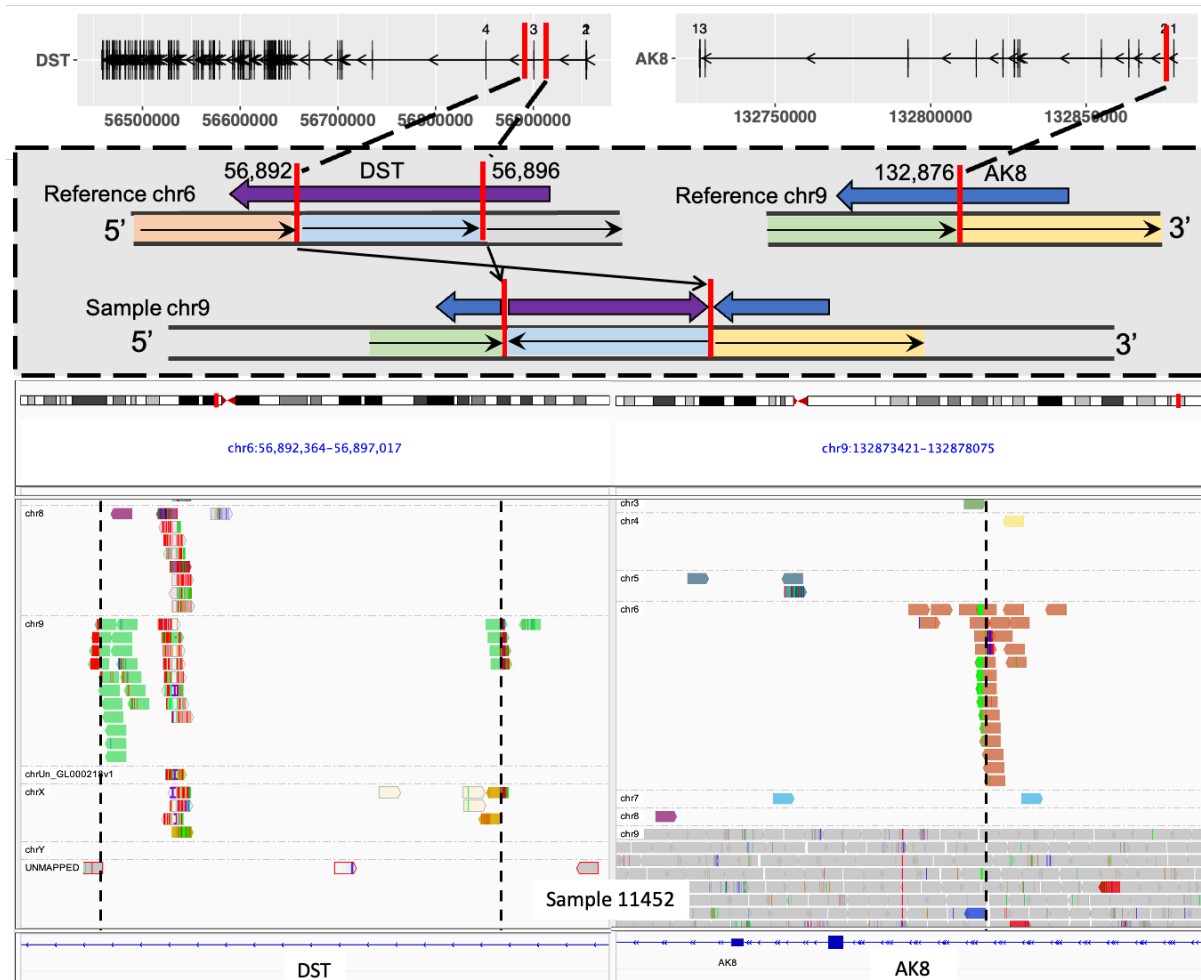

**Supplementary Figure 17. *AK8-DST* Translocation identified as potentially pathogenic SV.** Top row shows transcript structure of *DST* and *AK8* with TRA breakpoint in red. Middle row shows the TRA schematic diagram. Bottom row shows the sequencing read depth and read alignments around TRA breakpoints using Integrative Genomic Viewer. Both the discordantly aligned read-pairs (green and orange) and split-reads (soft-clipped bases in rainbow colour) support the existence of the TRA and its breakpoints. Sequencing reads with mate aligned to chr9 are in green and reads with mate aligned to chr6 are in orange. TRA breakpoints are shown in dashed black vertical lines.

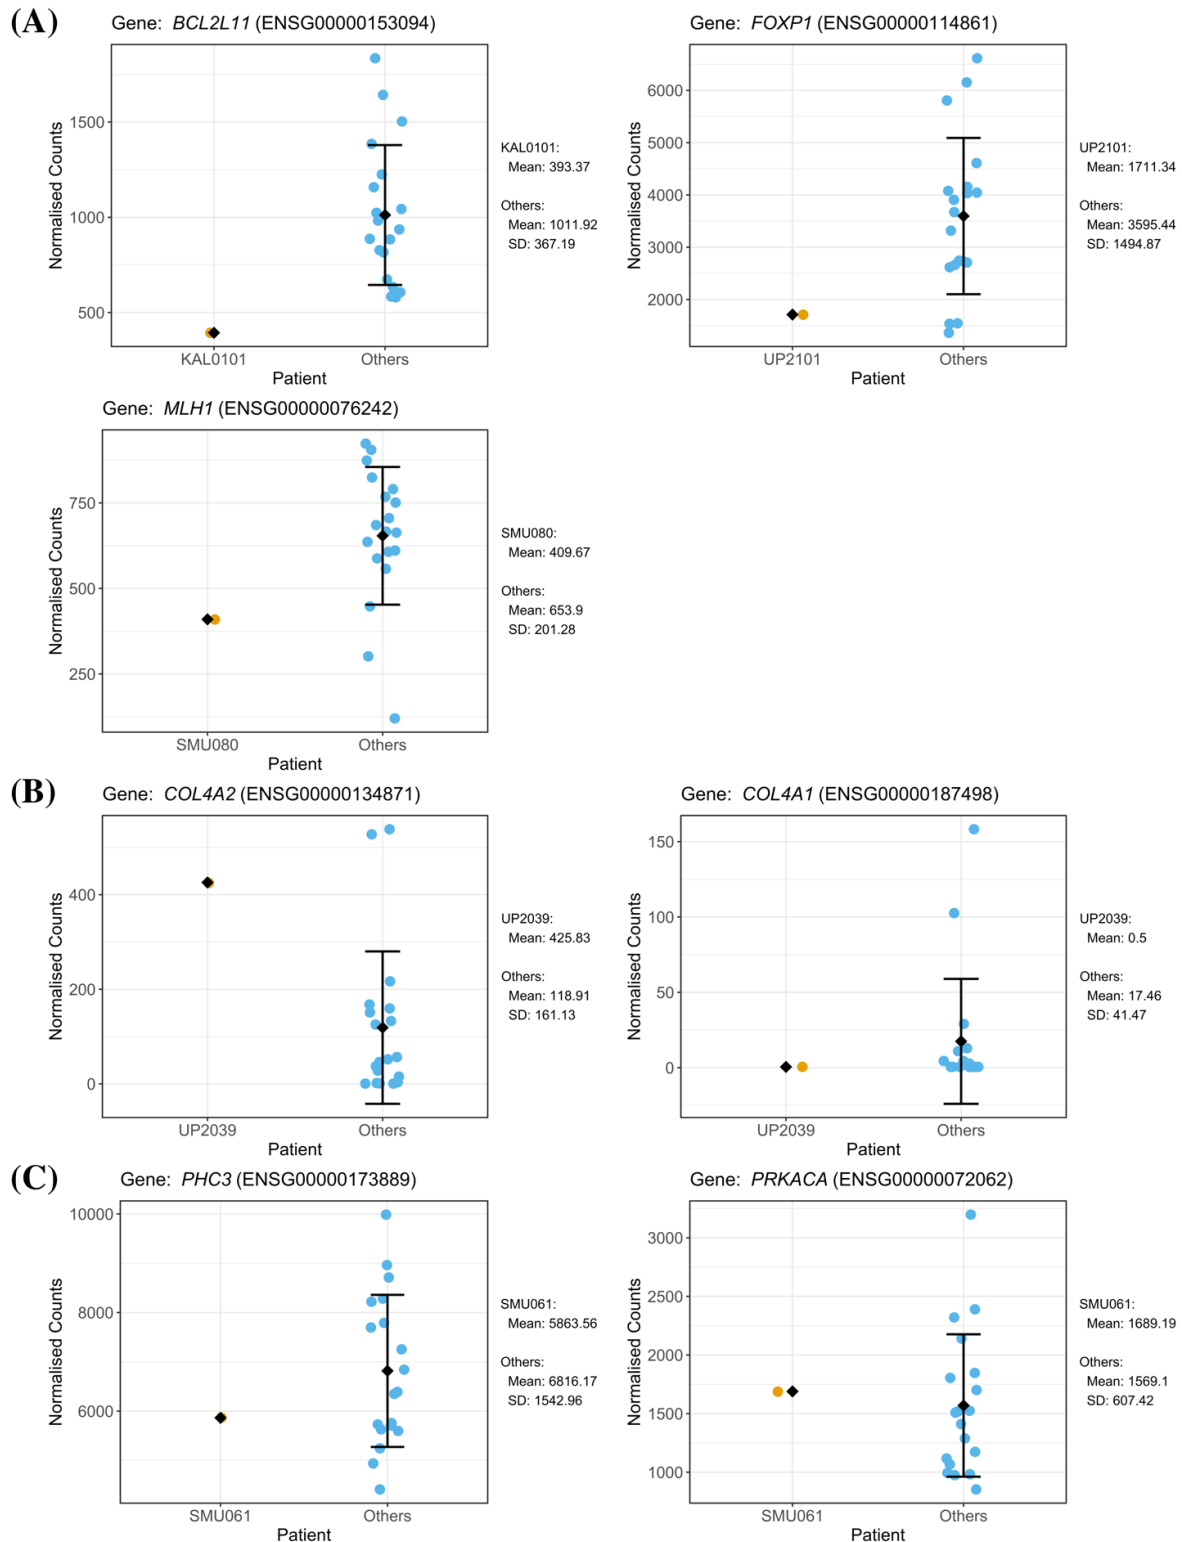

**Supplementary Figure 18. Differential expression analysis of seven genes associated with potentially pathogenic SVs in the blood of 20 prostate cancer patients.** (A) PP-SVs residing in *BCL2L11*, *FOXP1*, and *MLH1* in patients KAL0101, UP2101, and SMU080, respectively, are associated with the downregulation of the corresponding genes compared to other samples. (B) Patient UP2039 exhibited a high expression of *COL4A2*, while *COL4A1* is not expressed. (C) In patient SMU061, PP-SV affecting *PH3* and *PRKACA* shows no significant difference in expression levels to the cohort. Source data are provided as a Source Data file.

## REFERENCES

1. Liu H, *et al.* Tumor-Promoting ATAD2 and Its Preclinical Challenges. *Biomolecules* **12**, (2022).
2. Liu Y, Liao XW, Qin YZ, Mo XW, Luo SS. Identification of F5 as a Prognostic Biomarker in Patients with Gastric Cancer. *Biomed Res Int* **2020**, 9280841 (2020).
3. Klee EW, *et al.* Candidate serum biomarkers for prostate adenocarcinoma identified by mRNA differences in prostate tissue and verified with protein measurements in tissue and blood. *Clin Chem* **58**, 599-609 (2012).
4. Patra R, Chakraborty J, Das NC, Mukherjee S. An integrated omics study on the role of HDAC9 gene in the oncogenic events of human gastrointestinal-tract associated cancers. *Human Gene* **37**, 201189 (2023).
5. Kim B, Sohn HM, Hyun H, Lim W. Effect of HDAC9 inhibition on epithelial-mesenchymal transition in CD133+ prostate cancer cell lines. *J Chemother* **34**, 45-54 (2022).
6. Jiang FN, *et al.* Increasing of FKBP9 can predict poor prognosis in patients with prostate cancer. *Pathol Res Pract* **216**, 152732 (2020).
7. Xu H, *et al.* FKBP9 promotes the malignant behavior of glioblastoma cells and confers resistance to endoplasmic reticulum stress inducers. *Journal of Experimental & Clinical Cancer Research* **39**, 44 (2020).
8. Dervovic D, *et al.* In vivo CRISPR screens reveal Serpinb9 and Adam2 as regulators of immune therapy response in lung cancer. *Nature Communications* **14**, 3150 (2023).
9. O'Farrell H, *et al.* Integrative Genomic Analyses Identifies GGA2 as a Cooperative Driver of EGFR-Mediated Lung Tumorigenesis. *J Thorac Oncol* **14**, 656-671 (2019).
10. Yeini E, *et al.* P-selectin axis plays a key role in microglia immunophenotype and glioblastoma progression. *Nature Communications* **12**, 1912 (2021).
11. Li XY, *et al.* OAS3 is a Co-Immune Biomarker Associated With Tumour Microenvironment, Disease Staging, Prognosis, and Treatment Response in Multiple Cancer Types. *Front Cell Dev Biol* **10**, 815480 (2022).
12. Xu N, *et al.* Identification of key DNA methylation-driven genes in prostate adenocarcinoma: an integrative analysis of TCGA methylation data. *J Transl Med* **17**, 311 (2019).
13. Rose AM. Cancer and the junkyard chromosome: how repeat DNA sequence on chromosome 19 influences risk of malignant disease. *Oncotarget* **9**, 31942-31944 (2018).

14. Biswas D, *et al.* Inhibiting BCKDK in triple negative breast cancer suppresses protein translation, impairs mitochondrial function, and potentiates doxorubicin cytotoxicity. *Cell Death Discovery* **7**, 241 (2021).
15. Sun T, Bi F, Liu Z, Yang Q. SLC7A2 serves as a potential biomarker and therapeutic target for ovarian cancer. *Aging (Albany NY)* **12**, 13281-13296 (2020).
16. Jiang S, *et al.* Lower SLC7A2 expression is associated with enhanced multidrug resistance, less immune infiltrates and worse prognosis of NSCLC. *Cell Communication and Signaling* **21**, 9 (2023).
17. Alessandrini F, Pezzè L, Menendez D, Resnick MA, Ciribilli Y. ETV7-Mediated DNJC15 Repression Leads to Doxorubicin Resistance in Breast Cancer Cells. *Neoplasia* **20**, 857-870 (2018).
18. Zhang H, *et al.* Onco-miR-24 regulates cell growth and apoptosis by targeting BCL2L1 in gastric cancer. *Protein Cell* **7**, 141-151 (2016).
19. Tarsounas M, Sung P. The antitumorigenic roles of BRCA1–BARD1 in DNA repair and replication. *Nature Reviews Molecular Cell Biology* **21**, 284-299 (2020).
20. Feng Z, *et al.* Could CTSK and COL4A2 be specific biomarkers of poor prognosis for patients with gastric cancer in Asia?—a microarray analysis based on regional population. *Journal of Gastrointestinal Oncology* **11**, 386-401 (2020).
21. JingSong H, *et al.* siRNA-mediated suppression of collagen type iv alpha 2 (COL4A2) mRNA inhibits triple-negative breast cancer cell proliferation and migration. *Oncotarget* **8**, 2585-2593 (2017).
22. Zhuang W, Zhang C, Hao F, Sun X. Baculoviral IAP Repeat Containing 6 (BIRC6) Is a Predictor of Prognosis in Prostate Cancer. *Med Sci Monit* **24**, 839-845 (2018).
23. Hao T, Wang Z, Yang J, Zhang Y, Shang Y, Sun J. MALAT1 knockdown inhibits prostate cancer progression by regulating miR-140/BIRC6 axis. *Biomed Pharmacother* **123**, 109666 (2020).
24. Dong X, *et al.* Elevated expression of BIRC6 protein in non-small-cell lung cancers is associated with cancer recurrence and chemoresistance. *J Thorac Oncol* **8**, 161-170 (2013).
25. Gómez Bergna SM, *et al.* Exploring the Role of the Inhibitor of Apoptosis BIRC6 in Breast Cancer: A Database Analysis. *JCO Clinical Cancer Informatics*, e2200093 (2022).
26. Lin R, *et al.* Suppression of latent transforming growth factor- $\beta$  (TGF- $\beta$ )-binding protein 1 (LTBP1) inhibits natural killer/ T cell lymphoma progression by inactivating the TGF- $\beta$ /Smad and p38MAPK pathways. *Experimental Cell Research* **407**, 112790 (2021).

27. Saraon P, *et al.* Proteomic Profiling of Androgen-independent Prostate Cancer Cell Lines Reveals a Role for Protein S during the Development of High Grade and Castration-resistant Prostate Cancer. *Journal of Biological Chemistry* **287**, 34019-34031 (2012).
28. Cai R, *et al.* LTBP1 promotes esophageal squamous cell carcinoma progression through epithelial-mesenchymal transition and cancer-associated fibroblasts transformation. *Journal of Translational Medicine* **18**, 139 (2020).
29. Zhang J, Deng H, Wang J. LTBP1 promotes the progression of triple negative breast cancer via activating the RhoA/ROCK signaling pathway. *Cancer Insight* **3**, (2023).
30. Gu H, *et al.* Immune suppressive signaling regulated by latent transforming growth factor beta binding protein 1 promotes metastasis in cervical cancer. *Braz J Med Biol Res* **55**, e12206 (2023).
31. Groenendyk J, *et al.* Loss of the fructose transporter SLC2A5 inhibits cancer cell migration. *Front Cell Dev Biol* **10**, 896297 (2022).
32. Nourmohammadi Abadchi S, *et al.* MLH1 Loss in Primary Prostate Cancer. *JCO Precis Oncol* **7**, e2200611 (2023).
33. Bonadona V, *et al.* Cancer Risks Associated With Germline Mutations in MLH1, MSH2, and MSH6 Genes in Lynch Syndrome. *JAMA* **305**, 2304-2310 (2011).
34. Abida W, *et al.* Genomic correlates of clinical outcome in advanced prostate cancer. *Proceedings of the National Academy of Sciences* **116**, 11428-11436 (2019).
35. Sowalsky AG, *et al.* Loss of Wavel gene defines a subtype of lethal prostate cancer. *Oncotarget*; Vol 6, No 14, (2015).
36. Cai H, *et al.* In Vivo Application of CRISPR/Cas9 Revealed Implication of Foxa1 and Foxp1 in Prostate Cancer Proliferation and Epithelial Plasticity (2022).
37. Takayama K, *et al.* Integrative analysis of FOXP1 function reveals a tumor-suppressive effect in prostate cancer. *Mol Endocrinol* **28**, 2012-2024 (2014).
38. Yuan G, *et al.* Elevated NSD3 histone methylation activity drives squamous cell lung cancer. *Nature* **590**, 504-508 (2021).
39. Nuñez Y, Vera S, Baeza V, Gonzalez-Pecchi V. NSD3 in Cancer: Unraveling Methyltransferase-Dependent and Isoform-Specific Functions. *Int J Mol Sci* **25**, (2024).
40. Bakht MK, *et al.* Identification of alternative protein targets of glutamate-ureido-lysine associated with PSMA tracer uptake in prostate cancer cells. *Proceedings of the National Academy of Sciences* **119**, e2025710119 (2022).

41. Di Y, *et al.* The c-MYC-WDR43 signalling axis promotes chemoresistance and tumour growth in colorectal cancer by inhibiting p53 activity. *Drug Resistance Updates* **66**, 100909 (2023).
42. Sun H, *et al.* WD repeat domain 43 promotes malignant progression of non-small cell lung cancer by regulating CDK2. *The International Journal of Biochemistry & Cell Biology* **151**, 106293 (2022).
43. Li Z, *et al.* WD40 repeat 43 mediates cell survival, proliferation, migration and invasion via vimentin in colorectal cancer. *Cancer Cell International* **21**, 418 (2021).
44. Ruan Y, Xu H, Ji X. High expression of NPM1 via the Wnt/ $\beta$ -catenin signalling pathway might predict poor prognosis for patients with prostate adenocarcinoma. *Clin Exp Pharmacol Physiol* **49**, 525-535 (2022).
45. Loubeau G, *et al.* NPM1 silencing reduces tumour growth and MAPK signalling in prostate cancer cells. *PLoS One* **9**, e96293 (2014).
46. Liu XS, *et al.* NPM1 Is a Prognostic Biomarker Involved in Immune Infiltration of Lung Adenocarcinoma and Associated With m6A Modification and Glycolysis. *Front Immunol* **12**, 724741 (2021).
47. Gordon CA, Gong X, Ganesh D, Brooks JD. NUSAP1 promotes invasion and metastasis of prostate cancer. *Oncotarget* **8**, 29935-29950 (2017).
48. Liang B, Wang J. EVI1 in Leukemia and Solid Tumors. *Cancers (Basel)* **12**, (2020).
49. Ma Y, *et al.* CRISPR-mediated *MECOM* depletion retards tumor growth by reducing cancer stem cell properties in lung squamous cell carcinoma. *Molecular Therapy* **30**, 3341-3357 (2022).
50. Han L, *et al.* Comprehensive characterization of PKHD1 mutation in human colon cancer. *Cancer Med* **13**, (2024).
51. Ward CJ, *et al.* Germline PKHD1 mutations are protective against colorectal cancer. *Human Genetics* **129**, 345-349 (2011).
52. Huang J, *et al.* The Role of CTNNA1 in Malignancies: An Updated Review. *J Cancer* **14**, 219-230 (2023).
53. Jossion S, Chung LW, Gururajan M. microRNAs and Prostate Cancer. *Adv Exp Med Biol* **889**, 105-118 (2015).
54. Berthon AS, Szarek E, Stratakis CA. PRKACA: the catalytic subunit of protein kinase A and adrenocortical tumors. *Front Cell Dev Biol* **3**, 26 (2015).
55. Angrisani A, Di Fiore A, De Smaele E, Moretti M. The emerging role of the KCTD proteins in cancer. *Cell Communication and Signaling* **19**, 56 (2021).



56. Qiu X, *et al.* Identification of m6A-Associated Gene DST as a Prognostic and Immune-Associated Biomarker in Breast Cancer Patients. *Int J Gen Med* **15**, 523-534 (2022).
57. Huang R, *et al.* Co-expression Analysis of Genes and Tumor-Infiltrating Immune Cells in Metastatic Uterine Carcinosarcoma. *Reproductive Sciences* **28**, 2685-2698 (2021).
